# Supplementary material for: Responses of branching reef corals Acropora digitifera and Montipora digitata to elevated temperature and pCO2
Source: PeerJ. 2020 Dec 21;8:e10562. doi: 10.7717/peerj.10562 (PMC7759137; doi:10.7717/peerj.10562)
Supplement: Supplemental Information 1 [file peerj-08-10562-s001.xlsx]

## Sheet: Sheet1
		Bath			Metrohm pH
Date	Sample	Temp (°C)	Salinity	Metrohm (°C)	mV			slope (%)	pHT
						pH(S)TRIS	pH(S)AMP
2016-05-20	TRIS	25	34.5	24.7	-64.46	8.09768		0.97066	8.09768		Slope should be better than 95%, iedeally >98%.
	AMP	25.2	34.5	24.7	10.5		6.79231		6.79231
	CO2 400A ppm	25.2	34.5	24.8	-63.9				8.08793			Temp(°C)		Salinity	Temp(K)	pH(S)
	CO2 400B ppm	25.2	34.5	24.8	-66				8.1245		TRIS	25		35	298.15	8.08927
	CO2 600A ppm	25.2	34.5	24.7	-60				8.02001							.=(11997+3.7669*E19+0.00178*E19^2)/(F19)-381.3088-0.011634*E19+67.63163*LN(F19)-0.121538*(F19)-LOG10(1-0.00106*E19)
	CO2 600B ppm	25.2	34.5	24.9	-59.9				8.01827		AMP	25		35	298.15	6.78658
	CO2 800A ppm	25.2	34.5	24.9	-51.5				7.87199							.=(111.35+5.44875*D21)/(E21)+41.6775-0.0155683*D21-6.20815*LN(C21)-LOG10(1-0.00106*D21)
	CO2 800B ppm	25.2	34.5	24.9	-51				7.86328			EMP(TRIS)		EMP(AMP)	Eletrode response (s)				%
	CO2 1000A ppm	25.2	34.5	24.9	-48.4				7.81801		Example	10.5		-64.46		-57.5423			-0.972656
	CO2 1000B ppm	25.2	34.5	25.1	-46.6				7.78666
											PICES 2007 http://cdiac.ornl.gov/oceans/Handbook_2007.html
2016-05-27	TRIS	25	34.5	25.6	-64.45	8.06967		0.965601	8.0975			Temp(°C)		Salinity	Temp(K)	pH(S)
	AMP	25.2	34.5	25.7	9.9		6.76814		6.80275			TRIS	25		35	298.15	8.09355	New equation
	CO2 400A ppm	25.2	34.5	25.7	-62.3				8.06006								.=(11911.08-18.2499*E28-0.039336*E28^2)/(F28)-366.27059+0.53993607*E28+0.00016329*E28^2+(64.52243-0.084041*E28)*LN(F28)-0.11149858*F28
	CO2 400B ppm	25.2	34.5	25.9	-64.6				8.10012			AMP	25		35	298.15	6.78658	Same equation as above
	CO2 600A ppm	25.2	34.5	25.9	-61				8.03743								.=(111.35+5.44875*D21)/(E21)+41.6775-0.0155683*D21-6.20815*LN(C21)-LOG10(1-0.00106*D21)
	CO2 600B ppm	25.2	34.5	25.9	-60.6				8.03046				EMP(TRIS)		EMP(AMP)	Eletrode response (s)				%
	CO2 800A ppm	25.2	34.5	25.9	-54.1				7.91727			Example	10.5		-64.46		-57.5423			-0.972656
	CO2 800B ppm	25.2	34.5	26	-54.8				7.92946
	CO2 1000A ppm	25.2	34.5	26.1	-48.6				7.82149
	CO2 1000B ppm	25.2	34.5	26.1	-49.8				7.84239
2016-06-03	TRIS	25	34.5	24.7	-67.1	8.09768		0.988231	8.14365
	AMP	25.2	34.5	24.9	9.5		6.78746		6.80972
	CO2 400A ppm	25.2	34.5	24.9	-62.5				8.06355
	CO2 400B ppm	25.2	34.5	24.9	-65.6				8.11753
	CO2 600A ppm	25.2	34.5	24.9	-61.5				8.04613
	CO2 600B ppm	25.2	34.5	24.9	-53.4				7.90508
	CO2 800A ppm	25.2	34.5	24.8	-52.1				7.88244
	CO2 800B ppm	25.2	34.5	25	-50.8				7.8598
	CO2 1000A ppm	25.2	34.5	25	-47.8				7.80756
	CO2 1000B ppm	25.2	34.5	24.9	-48.8				7.82497
2016-06-10	TRIS	25	34.5	22.9	-69	8.15408		0.972109	8.17674
	AMP	25.2	34.5	22.9	6.8		6.83605		6.85674
	CO2 400A ppm	25.2	34.5	23.2	-63.4				8.07922
	CO2 400B ppm	25.2	34.5	23.2	-63.8				8.08618
	CO2 600A ppm	25.2	34.5	23.1	-59.7				8.01479
	CO2 600B ppm	25.2	34.5	23.2	-59.5				8.0113
	CO2 800A ppm	25.2	34.5	23.2	-54.2				7.91901
	CO2 800B ppm	25.2	34.5	23.2	-54				7.91553
	CO2 1000A ppm	25.2	34.5	23.2	-48.9				7.82671
	CO2 1000B ppm	25.2	34.5	23.2	-49				7.82845
2016-06-17	TRIS	25	34.5	24.4	-67.5	8.10704		0.977379	8.15062
	AMP	25.2	34.5	24.4	8.1		6.79958		6.8341
	CO2 400A ppm	25.2	34.5	24.6	-63				8.07225
	CO2 400B ppm	25.2	34.5	24.7	-61.3				8.04265
	CO2 600A ppm	25.2	34.5	24.7	-59.4				8.00956
	CO2 600B ppm	25.2	34.5	24.7	-58.4				7.99215
	CO2 800A ppm	25.2	34.5	24.7	-53.6				7.90856
	CO2 800B ppm	25.2	34.5	24.7	-53.1				7.89985
	CO2 1000A ppm	25.2	34.5	24.5	-49.3				7.83368
	CO2 1000B ppm	25.2	34.5	24.6	-46.5				7.78492
2016-06-20	TRIS	25	34.5	25.8	-65.1	8.06346		0.97898	8.10882
	AMP	25.2	34.5	25.9	10.2		6.76331		6.79753
	CO2 400A ppm	25.2	34.5	25.8	-62.2				8.05832
	CO2 400B ppm	25.2	34.5	25.9	-62				8.05484
	CO2 600A ppm	25.2	34.5	25.8	-60.7				8.0322
	CO2 600B ppm	25.2	34.5	25.9	-60.3				8.02524
	CO2 800A ppm	25.2	34.5	25.8	-55.2				7.93642
	CO2 800B ppm	25.2	34.5	25.9	-54.7				7.92772
	CO2 1000A ppm	25.2	34.5	26	-50.3				7.85109
	CO2 1000B ppm	25.2	34.5	25.9	-50.1				7.84761
		2016-05-20	2016-05-27	2016-06-03	2016-06-10	2016-06-17	2016-06-20	pH mean	STEDV	Range	pH
	TRIS	8.09768	8.0975	8.14365	8.17674	8.15062	8.10882	8.12917	0.0326832		8.12±0.03
	AMP	6.79231	6.80275	6.80972	6.85674	6.8341	6.79753	6.81553	0.0249131		6.81±0.02
	CO2 400A ppm	8.08793	8.06006	8.06355	8.07922	8.07225	8.05832	8.07022	0.0117293	8.05-8.08	8.07±0.01
	CO2 400B ppm	8.1245	8.10012	8.11753	8.08618	8.04265	8.05484	8.08764	0.0331953	8.04-8.12	8.08±0.03
	CO2 600A ppm	8.02001	8.03743	8.04613	8.01479	8.00956	8.0322	8.02669	0.0141653	8.00-8.04	8.02±0.01
	CO2 600B ppm	8.01827	8.03046	7.90508	8.0113	7.99215	8.02524	7.99708	0.0470045	7.90-8.03	7.99±0.04
	CO2 800A ppm	7.87199	7.91727	7.88244	7.91901	7.90856	7.93642	7.90595	0.024249	7.87-7.93	7.90±0.02
	CO2 800B ppm	7.86328	7.92946	7.8598	7.91553	7.89985	7.92772	7.89927	0.0311061	7.85-7.92	7.89±0.03
	CO2 1000A ppm	7.81801	7.82149	7.80756	7.82671	7.83368	7.85109	7.82642	0.0149161	7.80-7.85	7.82±0.01
	CO2 1000B ppm	7.78666	7.84239	7.82497	7.82845	7.78492	7.84761	7.81917	0.0271945	7.78-7.84	7.81±0.02
