# Supplementary material for: Responses of branching reef corals Acropora digitifera and Montipora digitata to elevated temperature and pCO2
Source: PeerJ. 2020 Dec 21;8:e10562. doi: 10.7717/peerj.10562 (PMC7759137; doi:10.7717/peerj.10562)
Supplement: Supplemental Information 3 [file peerj-08-10562-s003.xlsx]

## Sheet: Sheet1
Species	Temperature	Calcification Rate
A. digitifera	28 C	3.56658
A. digitifera	28 C	4.0691
A. digitifera	28 C	7.98917
A. digitifera	28 C	6.28093
A. digitifera	28 C	4.28278
A. digitifera	30 C	6.84
A. digitifera	30 C	5.6926
A. digitifera	30 C	4.9217
A. digitifera	30 C	5.12633
A. digitifera	30 C	5.3539
A. digitifera	32 C	2.28782
A. digitifera	32 C	1.61871
A. digitifera	32 C	0.796703
A. digitifera	32 C	3.00725
A. digitifera	32 C	0.734994
M. digitata	28 C	8.4507
M. digitata	28 C	13.4021
M. digitata	28 C	15.9912
M. digitata	28 C	12.3909
M. digitata	28 C	17.0366
M. digitata	30 C	5.53379
M. digitata	30 C	5.28
M. digitata	30 C	13.1371
M. digitata	30 C	9.26829
M. digitata	30 C	9.90291
M. digitata	32 C	7.19204
M. digitata	32 C	5.08753
M. digitata	32 C	3.47408
M. digitata	32 C	4.29397
M. digitata	32 C	7.04981
