# Supplementary material for: Responses of branching reef corals Acropora digitifera and Montipora digitata to elevated temperature and pCO2
Source: PeerJ. 2020 Dec 21;8:e10562. doi: 10.7717/peerj.10562 (PMC7759137; doi:10.7717/peerj.10562)
Supplement: Supplemental Information 4 [file peerj-08-10562-s004.xlsx]

## Sheet: Sheet1
		400 ppm A		400 ppm B		600 ppm A		600 ppm B		800 ppm A		800 ppm B		1000 ppm A		1000 ppm B
#	Date Time	Temp, °C	Intensity, Lux	Temp, °C	Intensity, Lux	Temp, °C	Intensity, Lux	Temp, °C	Intensity, Lux	Temp, °C	Intensity, Lux	Temp, °C	Intensity, Lux	Temp, °C	Intensity, Lux	Temp, °C	Intensity, Lux
1	2016-05-20 08:00:00	26.977	8611.2	27.567	7577.8	27.075	10333.4	27.075	7577.8	27.37	3100	27.468	8611.2	29.352	6544.5	27.468	6544.5
2	2016-05-20 09:00:00	27.075	7233.4	27.567	7577.8	27.075	10333.4	27.173	6544.5	27.37	2927.8	27.567	8266.7	33.014	7233.4	27.468	6544.5
3	2016-05-20 10:00:00	27.173	9300.1	27.468	6544.5	27.272	9300.1	27.272	7577.8	27.272	3616.7	27.37	9300.1	33.535	8266.7	27.567	6544.5
4	2016-05-20 11:00:00	27.272	8611.2	27.272	6544.5	27.37	10333.4	27.37	7577.8	27.272	3788.9	27.468	9644.5	32.394	7577.8	27.567	6544.5
5	2016-05-20 12:00:00	27.272	8611.2	27.272	7577.8	27.37	10333.4	27.37	7577.8	27.272	2669.5	27.567	8611.2	28.655	7233.4	27.567	9300.1
6	2016-05-20 13:00:00	26.977	9300.1	27.173	7233.4	27.075	9644.5	27.075	7577.8	27.272	2669.5	28.06	9300.1	26.977	7233.4	26.977	6544.5
7	2016-05-20 14:00:00	26.977	8611.2	27.272	10677.8	27.075	9644.5	27.075	7577.8	27.272	4133.4	28.159	8266.7	26.781	7233.4	26.977	13089
8	2016-05-20 15:00:00	27.37	13089	27.567	4650	27.468	12400.1	27.37	11022.3	27.272	3961.1	27.961	9644.5	27.272	13089	27.272	12400.1
9	2016-05-20 16:00:00	27.468	13155.7	27.567	4650	27.468	13089	27.37	1550	27.272	3961.1	27.961	13089	27.272	11711.2	27.468	12400.1
10	2016-05-20 17:00:00	27.173	7577.8	27.665	5166.7	27.468	6544.5	27.37	1636.1	27.272	2755.6	27.961	15155.7	27.272	11711.2	27.468	11711.2
11	2016-05-20 18:00:00	27.272	8266.7	27.567	5166.7	27.468	6544.5	27.37	1636.1	27.272	2927.8	28.06	15844.5	27.272	11711.2	27.468	12400.1
12	2016-05-20 19:00:00	27.272	0	27.173	0	27.468	0	27.37	0	27.37	0	28.159	0	27.272	0	27.468	0
13	2016-05-20 20:00:00	27.173	0	27.272	0	27.173	0	26.781	0	26.977	0	27.961	0	26.977	0	26.977	0
14	2016-05-20 21:00:00	27.173	0	27.272	0	27.173	0	26.781	0	26.977	0	27.961	0	27.075	0	26.781	0
15	2016-05-20 22:00:00	27.173	0	27.272	0	27.075	0	26.781	0	26.977	0	28.06	0	27.075	0	26.683	0
16	2016-05-20 23:00:00	27.075	0	27.272	0	27.075	0	26.781	0	26.977	0	28.06	0	27.075	0	26.585	0
17	2016-05-21	26.977	0	27.272	0	27.075	0	26.781	0	26.977	0	28.06	0	27.075	0	26.488	0
18	2016-05-21 01:00:00	27.075	0	27.272	0	27.173	0	26.781	0	26.977	0	28.06	0	27.173	0	26.488	0
19	2016-05-21 02:00:00	27.075	0	27.272	0	27.173	0	26.781	0	26.977	0	28.357	0	27.173	0	26.585	0
20	2016-05-21 03:00:00	27.075	0	27.272	0	27.173	0	26.879	0	26.977	0	28.456	0	27.173	0	26.585	0
21	2016-05-21 04:00:00	27.075	0	27.272	0	27.173	0	26.781	0	26.977	0	28.754	0	27.272	0	26.585	0
22	2016-05-21 05:00:00	27.173	0	27.272	0	27.075	0	26.781	0	26.977	0	28.853	0	27.272	0	26.683	0
23	2016-05-21 06:00:00	27.075	0	27.272	0	27.173	0	26.781	0	26.977	0	29.053	0	27.37	0	26.683	0
24	2016-05-21 07:00:00	27.075	2927.8	27.665	5166.7	27.173	6200	26.781	1493	26.977	3271.3	28.853	13089	27.272	11711	26.683	3444.5
25	2016-05-21 08:00:00	27.075	3616.7	27.567	5166.7	27.468	6200	27.173	1550	27.272	3272.2	29.053	11022.3	27.567	12400.1	27.075	2755.6
26	2016-05-21 09:00:00	27.173	3788.9	27.665	5166.7	27.567	6200	27.272	1636.1	27.272	3272.2	29.452	13089	27.567	11022.3	27.272	3272.2
27	2016-05-21 10:00:00	27.173	2669.5	27.468	5166.7	27.468	6200	27.272	1636.1	27.272	4133.4	29.352	13777.9	27.665	11711.2	27.37	2755.6
28	2016-05-21 11:00:00	27.272	2669.5	27.468	5166.7	27.567	6200	27.37	1636.1	27.272	3100	29.452	13777.9	27.665	11711.2	27.37	2755.6
29	2016-05-21 12:00:00	27.272	4133.4	27.468	5166.7	27.37	6544.5	27.468	1636.1	27.272	3444.5	28.555	12400.1	27.665	11711.2	27.468	3616.7
30	2016-05-21 13:00:00	27.272	3961.1	27.567	5166.7	27.468	6200	27.468	1636.1	27.272	4650	27.665	14466.8	27.665	11711.2	27.37	2669.5
31	2016-05-21 14:00:00	27.272	3961.1	27.567	5166.7	27.468	6544.5	27.37	1636.1	27.37	2669.5	27.764	12400.1	27.665	11711.2	27.37	2583.4
32	2016-05-21 15:00:00	27.272	2755.6	27.567	5166.7	27.468	6200	27.37	1550	27.37	2927.8	27.862	13089	27.665	11711.2	27.37	4477.8
33	2016-05-21 16:00:00	27.272	2927.8	27.567	5166.7	27.468	6200	27.37	1550	27.37	4305.6	27.764	14466.8	27.665	11022.3	27.37	2755.6
34	2016-05-21 17:00:00	27.272	3788.9	27.468	5166.7	27.468	6200	27.37	1636.1	27.37	3272.2	27.665	13089	27.665	11711.2	27.272	3272.2
35	2016-05-21 18:00:00	27.173	3272.2	27.567	5166.7	27.468	6200	27.37	1636.1	27.37	3616.7	27.764	16533.4	27.764	11711.2	27.272	3272.2
36	2016-05-21 19:00:00	27.173	0	27.272	0	27.567	0	27.272	0	27.37	0	27.665	0	27.665	0	27.173	0
37	2016-05-21 20:00:00	27.173	0	27.272	0	27.075	0	26.781	0	26.977	0	27.468	0	27.468	0	26.683	0
38	2016-05-21 21:00:00	27.272	0	27.272	0	27.272	0	26.683	0	26.977	0	27.272	0	27.468	0	26.488	0
39	2016-05-21 22:00:00	27.272	0	27.272	0	27.075	0	26.781	0	26.977	0	27.272	0	27.468	0	26.585	0
40	2016-05-21 23:00:00	27.173	0	27.272	0	27.272	0	26.781	0	26.977	0	27.37	0	27.468	0	26.585	0
41	2016-05-22	27.075	0	27.272	0	27.272	0	26.781	0	26.977	0	27.272	0	27.468	0	26.585	0
42	2016-05-22 01:00:00	27.075	0	27.272	0	27.075	0	26.781	0	26.977	0	27.37	0	27.468	0	26.585	0
43	2016-05-22 02:00:00	27.272	0	27.272	0	27.173	0	26.879	0	26.977	0	27.37	0	27.468	0	26.585	0
44	2016-05-22 03:00:00	27.075	0	27.272	0	27.272	0	26.879	0	26.977	0	27.468	0	27.468	0	26.585	0
45	2016-05-22 04:00:00	27.272	0	27.272	0	27.173	0	26.781	0	26.977	0	27.567	0	27.468	0	26.488	0
46	2016-05-22 05:00:00	27.272	0	27.272	0	27.272	0	26.879	0	26.977	0	27.567	0	27.567	0	26.585	0
47	2016-05-22 06:00:00	27.075	0	27.272	0	27.272	0	26.781	0	26.977	0	27.567	0	27.468	0	26.488	0
48	2016-05-22 07:00:00	27.272	11711.2	27.665	5166.7	27.173	5051	26.781	1375	26.977	2927.8	27.567	5166.7	27.567	2755.6	26.488	3788.9
49	2016-05-22 08:00:00	27.173	10677.8	27.665	5166.7	27.468	6200	27.075	1636.1	27.37	3788.9	27.665	12400.1	27.862	11711.2	26.879	193.8
50	2016-05-22 09:00:00	27.075	10677.8	27.567	5166.7	27.567	5511.1	27.173	1636.1	27.272	3272.2	28.06	10677.8	27.862	11711.2	27.075	183
51	2016-05-22 10:00:00	27.173	10677.8	27.665	5166.7	27.468	5511.1	27.173	1550	27.272	3272.2	27.862	12400.1	27.862	11022.3	27.075	183
52	2016-05-22 11:00:00	27.173	9644.5	27.567	5166.7	27.567	6200	27.173	1636.1	27.272	4133.4	27.764	12400.1	27.764	11711.2	27.173	193.8
53	2016-05-22 12:00:00	27.173	9300.1	27.567	5166.7	27.567	6200	27.173	1636.1	27.37	4305.6	27.567	11711.2	27.862	11022.3	27.075	193.8
54	2016-05-22 13:00:00	27.272	10677.8	27.665	5166.7	27.468	6200	27.272	1636.1	27.272	3788.9	27.862	12400.1	27.862	11022.3	27.173	193.8
55	2016-05-22 14:00:00	27.173	11022.3	27.665	5166.7	27.468	6200	27.173	1636.1	27.37	3444.5	27.764	12400.1	27.862	11022.3	27.173	204.5
56	2016-05-22 15:00:00	27.272	14466.8	27.567	5166.7	27.37	6200	27.272	1550	27.37	3272.2	27.764	12400.1	27.862	11711.2	27.173	538.2
57	2016-05-22 16:00:00	27.173	10333.4	27.567	5166.7	27.468	5511.1	27.272	1636.1	27.37	3788.9	27.764	13777.9	27.862	11022.3	27.272	11022.3
58	2016-05-22 17:00:00	27.173	11711.2	27.665	5166.7	27.567	5511.1	27.272	1636.1	27.272	4305.6	27.961	13089	27.862	12400.1	27.272	11711.2
59	2016-05-22 18:00:00	27.173	11022.3	27.567	5166.7	27.37	6200	27.272	1722.2	27.37	3272.2	27.862	13777.9	27.862	11022.3	27.272	11711.2
60	2016-05-22 19:00:00	27.173	0	27.272	0	27.567	0	27.272	0	27.37	0	27.764	0	27.961	0	27.272	0
61	2016-05-22 20:00:00	27.173	0	27.272	0	27.173	0	26.781	0	27.37	0	27.567	0	27.567	0	26.781	0
62	2016-05-22 21:00:00	27.173	0	27.272	0	27.272	0	26.879	0	27.37	0	27.272	0	27.665	0	26.683	0
63	2016-05-22 22:00:00	27.173	0	27.272	0	27.272	0	26.781	0	27.37	0	27.37	0	27.567	0	26.585	0
64	2016-05-22 23:00:00	27.173	0	27.272	0	27.173	0	26.781	0	27.37	0	27.37	0	27.567	0	26.585	0
65	2016-05-23	27.075	0	27.272	0	27.272	0	26.781	0	27.37	0	27.37	0	27.567	0	26.585	0
66	2016-05-23 01:00:00	27.075	0	27.272	0	27.272	0	26.781	0	27.37	0	27.272	0	27.567	0	26.585	0
67	2016-05-23 02:00:00	27.173	0	27.272	0	27.173	0	26.781	0	27.37	0	26.977	0	27.567	0	26.585	0
68	2016-05-23 03:00:00	27.075	0	27.272	0	27.272	0	26.781	0	27.37	0	27.173	0	27.567	0	26.585	0
69	2016-05-23 04:00:00	27.075	0	27.272	0	27.173	0	26.879	0	27.37	0	27.075	0	27.567	0	26.585	0
70	2016-05-23 05:00:00	27.173	0	27.272	0	27.173	0	26.879	0	27.37	0	27.075	0	27.665	0	26.585	0
71	2016-05-23 06:00:00	27.173	0	27.272	0	27.272	0	26.879	0	27.37	0	27.173	0	27.665	0	26.585	0
72	2016-05-23 07:00:00	27.173	2755.6	27.567	5166.7	27.173	3788.9	26.879	3444.5	27.37	3616.7	27.173	12400.1	27.567	10677.8	26.585	11022.3
73	2016-05-23 08:00:00	27.173	4133.4	27.665	5166.7	27.468	6200	27.173	1722.2	27.37	4994.5	27.468	12400.1	27.862	11711.2	27.075	11711.2
74	2016-05-23 09:00:00	27.173	3272.2	27.665	5166.7	27.37	4305.6	27.272	1636.1	27.37	3961.1	27.665	13089	27.862	11022.3	27.272	764.2
75	2016-05-23 10:00:00	27.173	5511.1	27.468	6200	27.37	4477.8	27.272	1722.2	27.37	6200	27.567	12400.1	27.961	11711.2	27.272	796.5
76	2016-05-23 11:00:00	27.173	3616.7	27.567	6200	27.37	4305.6	27.37	1722.2	27.37	2927.8	27.567	13777.9	27.862	11711.2	27.272	10677.8
77	2016-05-23 12:00:00	27.272	3272.2	27.468	6200	27.272	4477.8	27.37	1636.1	27.37	4650	27.665	13089	27.961	11711.2	27.272	11022.3
78	2016-05-23 13:00:00	27.173	4133.4	27.468	6200	27.37	4305.6	27.37	1636.1	27.37	3272.2	27.567	13777.9	27.961	11022.3	27.272	11022.3
79	2016-05-23 14:00:00	27.173	4305.6	27.468	5511.1	27.272	4305.6	27.468	1636.1	27.37	3272.2	27.567	13089	27.468	11711.2	27.37	11022.3
80	2016-05-23 15:00:00	27.272	4133.4	27.567	5511.1	27.37	4305.6	27.468	1636.1	27.37	2927.8	27.567	15155.7	27.37	11711.2	27.37	796.5
81	2016-05-23 16:00:00	27.272	5166.7	27.567	6200	27.37	4305.6	27.468	1636.1	27.37	2755.6	27.567	13089	27.272	11022.3	27.37	861.1
82	2016-05-23 17:00:00	27.272	2669.5	27.567	6200	27.37	4477.8	27.567	1636.1	27.37	2497.2	27.665	14466.8	27.37	11022.3	27.468	839.6
83	2016-05-23 18:00:00	27.272	4133.4	27.468	6200	27.272	4305.6	27.468	1722.2	27.37	3616.7	27.665	13089	27.272	11711.2	27.37	12400.1
84	2016-05-23 19:00:00	27.173	0	27.272	0	27.37	0	27.468	0	27.37	0	27.567	0	27.272	0	27.37	0
85	2016-05-23 20:00:00	27.075	0	27.173	0	27.173	0	26.781	0	27.37	0	27.468	0	26.585	0	26.879	0
86	2016-05-23 21:00:00	27.075	0	27.272	0	27.173	0	26.879	0	27.37	0	27.37	0	26.39	0	26.585	0
87	2016-05-23 22:00:00	27.075	0	27.272	0	27.075	0	26.781	0	27.37	0	27.37	0	26.39	0	26.488	0
88	2016-05-23 23:00:00	27.173	0	27.272	0	27.173	0	26.781	0	27.37	0	27.37	0	26.292	0	26.585	0
89	2016-05-24	27.075	0	27.272	0	27.173	0	26.781	0	27.37	0	27.272	0	26.39	0	26.585	0
90	2016-05-24 01:00:00	27.173	0	27.272	0	27.173	0	26.781	0	27.37	0	27.37	0	26.39	0	26.683	0
91	2016-05-24 02:00:00	27.173	0	27.272	0	27.173	0	26.879	0	27.37	0	27.37	0	26.39	0	26.585	0
92	2016-05-24 03:00:00	27.075	0	27.272	0	27.173	0	26.879	0	27.37	0	27.272	0	26.292	0	26.585	0
93	2016-05-24 04:00:00	27.075	0	27.272	0	27.173	0	26.781	0	27.37	0	27.075	0	26.488	0	26.585	0
94	2016-05-24 05:00:00	27.173	0	27.272	0	27.173	0	26.879	0	27.37	0	26.977	0	26.39	0	26.585	0
95	2016-05-24 06:00:00	27.173	0	27.272	0	27.075	0	26.781	0	27.37	0	26.977	0	26.39	0	26.585	0
96	2016-05-24 07:00:00	27.075	3100	27.567	4133.4	27.075	4305.6	26.781	1636.1	27.37	4822.3	27.075	14466.8	26.292	11711.2	26.683	11711.2
97	2016-05-24 08:00:00	27.272	10677.8	27.567	6200	27.468	4305.6	27.173	1722.2	27.37	2755.6	27.272	13777.9	26.781	11711.2	26.977	12400.1
98	2016-05-24 09:00:00	27.272	10677.8	27.567	6200	27.468	4477.8	27.173	1722.2	27.37	3616.7	27.567	14466.8	26.977	11711.2	27.173	12400.1
99	2016-05-24 10:00:00	27.173	10677.8	27.567	6200	27.468	4477.8	27.272	1722.2	27.37	4305.6	27.468	13777.9	27.075	11022.3	27.272	12400.1
100	2016-05-24 11:00:00	27.468	12400.1	27.567	6200	27.468	5166.7	27.37	1636.1	27.37	2927.8	27.567	12400.1	27.173	11711.2	27.272	11711.2
101	2016-05-24 12:00:00	27.468	8611.2	27.567	6200	27.468	5338.9	27.567	1722.2	27.37	3100	27.567	12400.1	27.272	11022.3	27.37	11711.2
102	2016-05-24 13:00:00	27.468	13089	27.567	6200	27.468	5166.7	27.468	1722.2	27.37	2669.5	27.567	13089	27.272	11711.2	27.37	12400.1
103	2016-05-24 14:00:00	27.567	12400.1	27.665	6200	27.567	5338.9	27.567	1722.2	27.468	3272.2	27.567	14466.8	27.468	11711.2	27.468	11022.3
104	2016-05-24 15:00:00	27.665	16533.4	27.764	6200	27.665	5166.7	27.665	1722.2	27.37	3100	27.665	13089	27.468	11022.3	27.567	12400.1
105	2016-05-24 16:00:00	27.665	11711.2	27.764	6200	27.665	4994.5	27.665	1636.1	27.37	2755.6	27.764	14466.8	27.567	11022.3	27.567	12400.1
106	2016-05-24 17:00:00	27.665	14466.8	27.764	6200	27.665	5338.9	27.665	1636.1	27.468	3100	27.764	12400.1	27.567	11022.3	27.567	12400.1
107	2016-05-24 18:00:00	27.665	14466.8	27.764	6200	27.665	5166.7	27.665	1636.1	27.37	3444.5	27.764	12400.1	27.468	11022.3	27.567	12400.1
108	2016-05-24 19:00:00	27.665	0	27.468	0	27.665	0	27.665	0	27.468	0	27.764	0	27.567	0	27.567	0
109	2016-05-24 20:00:00	27.173	0	27.272	0	27.173	0	27.075	0	27.468	0	27.567	0	26.879	0	27.075	0
110	2016-05-24 21:00:00	27.075	0	27.272	0	27.173	0	26.781	0	27.468	0	27.37	0	26.585	0	26.781	0
111	2016-05-24 22:00:00	27.37	0	27.272	0	27.173	0	26.879	0	27.468	0	27.37	0	26.488	0	26.683	0
112	2016-05-24 23:00:00	27.075	0	27.272	0	27.173	0	26.879	0	27.468	0	27.272	0	26.39	0	26.585	0
113	2016-05-25	27.272	0	27.272	0	27.173	0	26.879	0	27.468	0	27.37	0	26.39	0	26.585	0
114	2016-05-25 01:00:00	27.37	0	27.272	0	27.075	0	26.781	0	27.468	0	27.37	0	26.488	0	26.585	0
115	2016-05-25 02:00:00	27.37	0	27.272	0	27.173	0	26.781	0	27.468	0	27.272	0	26.488	0	26.585	0
116	2016-05-25 03:00:00	27.272	0	27.272	0	27.173	0	26.879	0	27.468	0	27.37	0	26.39	0	26.585	0
117	2016-05-25 04:00:00	27.37	0	27.272	0	27.173	0	26.879	0	27.468	0	27.272	0	26.39	0	26.585	0
118	2016-05-25 05:00:00	27.272	0	27.272	0	27.075	0	26.879	0	27.468	0	27.468	0	26.39	0	26.585	0
119	2016-05-25 06:00:00	27.272	0	27.272	0	27.173	0	26.781	0	27.468	0	27.37	0	26.488	0	26.585	0
120	2016-05-25 07:00:00	27.272	9644.5	27.665	6200	27.173	4994.5	26.781	1636.1	27.468	2669.5	27.37	13089	26.488	11022.3	26.683	12400.1
121	2016-05-25 08:00:00	27.567	14466.8	27.567	6200	27.567	5166.7	27.173	1722.2	27.468	3788.9	27.567	14466.8	26.879	11022.3	26.977	12400.1
122	2016-05-25 09:00:00	27.468	13777.9	27.567	6200	27.468	5338.9	27.37	1722.2	27.468	2927.8	27.567	14466.8	27.173	11022.3	27.272	12400.1
123	2016-05-25 10:00:00	27.468	14466.8	27.468	6200	27.37	4994.5	27.468	1636.1	27.468	2927.8	27.665	13089	27.272	10677.8	27.37	12400.1
124	2016-05-25 11:00:00	27.567	14466.8	27.567	6200	27.468	5166.7	27.468	1722.2	27.468	2411.1	27.665	13089	27.272	11022.3	27.37	12400.1
125	2016-05-25 12:00:00	27.468	14466.8	27.567	6200	27.468	5338.9	27.468	1636.1	27.468	4477.8	27.665	14466.8	27.272	11022.3	27.37	12400.1
126	2016-05-25 13:00:00	27.567	14466.8	27.764	6200	27.567	5166.7	27.567	1722.2	27.468	3100	27.665	13089	27.37	11022.3	27.468	12400.1
127	2016-05-25 14:00:00	27.665	14466.8	27.862	6200	27.665	4994.5	27.665	1636.1	27.468	2927.8	27.764	13777.9	27.468	11022.3	27.567	12400.1
128	2016-05-25 15:00:00	27.764	14466.8	27.862	6200	27.764	5166.7	27.764	1808.3	27.468	2755.6	27.764	13777.9	27.567	11022.3	27.665	12400.1
129	2016-05-25 16:00:00	27.665	1310	27.862	5511.1	27.764	4822.3	27.764	1636.1	27.468	2927.8	27.862	12400.1	27.567	11022.3	27.665	12400.1
130	2016-05-25 17:00:00	27.468	1238.9	27.862	6200	27.764	4994.5	27.764	1636.1	27.468	4305.6	27.862	13089	27.567	11022.3	27.665	11711.2
131	2016-05-25 18:00:00	27.468	1616.7	27.764	6200	27.665	4822.3	27.764	1722.2	27.468	5166.7	27.862	12400.1	27.468	11022.3	27.665	12400.1
132	2016-05-25 19:00:00	27.37	0	27.272	0	27.567	0	27.665	0	27.468	0	27.862	0	27.468	0	27.567	0
133	2016-05-25 20:00:00	27.173	0	27.272	0	27.075	0	26.977	0	27.468	0	27.567	0	26.781	0	27.075	0
134	2016-05-25 21:00:00	27.075	0	27.272	0	27.173	0	26.879	0	27.468	0	27.468	0	26.488	0	26.781	0
135	2016-05-25 22:00:00	27.173	0	27.272	0	27.173	0	26.781	0	27.468	0	27.468	0	26.39	0	26.683	0
136	2016-05-25 23:00:00	27.173	0	27.272	0	27.173	0	26.781	0	27.468	0	27.468	0	26.39	0	26.585	0
137	2016-05-26	27.075	0	27.272	0	27.173	0	26.781	0	27.468	0	27.468	0	26.39	0	26.585	0
138	2016-05-26 01:00:00	27.173	0	27.272	0	27.173	0	26.879	0	27.468	0	27.37	0	26.39	0	26.585	0
139	2016-05-26 02:00:00	27.173	0	27.37	0	27.075	0	26.879	0	27.468	0	27.468	0	26.39	0	26.585	0
140	2016-05-26 03:00:00	27.173	0	27.272	0	27.173	0	26.781	0	27.468	0	27.468	0	26.39	0	26.585	0
141	2016-05-26 04:00:00	27.272	0	27.272	0	27.075	0	26.781	0	27.468	0	27.468	0	26.39	0	26.585	0
142	2016-05-26 05:00:00	27.075	0	27.272	0	27.173	0	26.879	0	27.468	0	27.567	0	26.39	0	26.585	0
143	2016-05-26 06:00:00	27.173	0	27.272	0	27.173	0	26.879	0	27.468	0	27.272	0	26.39	0	26.585	0
144	2016-05-26 07:00:00	27.173	3444.5	27.665	5511.1	27.173	4994.5	26.781	1722.2	27.468	3788.9	27.37	13089	26.39	11022.3	26.585	11711.2
145	2016-05-26 08:00:00	27.37	3444.5	27.567	6200	27.468	4994.5	27.173	1722.2	27.468	5338.9	27.567	11711.2	26.977	10677.8	27.075	12400.1
146	2016-05-26 09:00:00	27.173	3444.5	27.665	6200	27.468	4650	27.37	1636.1	27.468	3444.5	27.764	13089	27.173	11022.3	27.272	12400.1
147	2016-05-26 10:00:00	27.272	3272.2	27.567	6200	27.567	4994.5	27.468	1808.3	27.468	3444.5	27.862	12400.1	27.173	11022.3	27.37	12400.1
148	2016-05-26 11:00:00	27.272	3444.5	27.665	6200	27.567	4650	27.567	1808.3	27.468	3961.1	27.862	12400.1	27.37	11022.3	27.468	11711.2
149	2016-05-26 12:00:00	27.37	4477.8	27.862	6200	27.665	7577.8	27.764	1808.3	27.468	3272.2	27.862	13089	27.468	11022.3	27.567	11711.2
150	2016-05-26 13:00:00	27.567	2669.5	27.961	6200	27.764	7577.8	27.862	1808.3	27.468	2669.5	27.862	13089	27.665	11022.3	27.764	11711.2
151	2016-05-26 14:00:00	27.665	3616.7	28.06	6200	27.862	7577.8	27.961	1808.3	27.468	3272.2	27.961	16533.4	27.764	11022.3	27.862	11022.3
152	2016-05-26 15:00:00	27.764	3100	28.06	6200	27.961	8266.7	28.06	1808.3	27.468	3788.9	28.06	12400.1	27.764	11022.3	27.862	11711.2
153	2016-05-26 16:00:00	27.764	3444.5	28.258	6200	27.961	8266.7	28.06	1808.3	27.468	2927.8	28.159	14466.8	27.862	11022.3	27.961	12400.1
154	2016-05-26 17:00:00	27.862	2927.8	28.258	6200	28.06	8266.7	28.159	1808.3	27.567	3272.2	28.159	14466.8	27.862	10677.8	28.06	12400.1
155	2016-05-26 18:00:00	27.862	2411.1	28.258	6200	28.06	7577.8	28.159	1722.2	27.567	2755.6	28.258	13777.9	27.862	11022.3	28.06	12400.1
156	2016-05-26 19:00:00	27.862	0	27.862	0	28.06	0	28.258	0	27.468	0	28.258	0	27.961	0	28.06	0
157	2016-05-26 20:00:00	27.37	0	27.272	0	27.37	0	27.468	0	27.468	0	28.06	0	27.272	0	27.567	0
158	2016-05-26 21:00:00	27.075	0	27.272	0	27.075	0	27.075	0	27.567	0	27.468	0	26.879	0	27.173	0
159	2016-05-26 22:00:00	27.173	0	27.173	0	27.173	0	26.781	0	27.468	0	27.075	0	26.683	0	26.879	0
160	2016-05-26 23:00:00	27.075	0	27.173	0	27.173	0	26.781	0	27.468	0	27.272	0	26.585	0	26.781	0
161	2016-05-27	27.173	0	27.272	0	27.173	0	26.781	0	27.567	0	27.173	0	26.488	0	26.683	0
162	2016-05-27 01:00:00	27.075	0	27.173	0	27.173	0	26.879	0	27.468	0	27.075	0	26.488	0	26.683	0
163	2016-05-27 02:00:00	27.173	0	27.272	0	27.075	0	26.781	0	27.567	0	27.272	0	26.39	0	26.683	0
164	2016-05-27 03:00:00	27.173	0	27.272	0	27.173	0	26.879	0	27.567	0	27.272	0	26.39	0	26.683	0
165	2016-05-27 04:00:00	27.173	0	27.272	0	27.173	0	26.781	0	27.567	0	27.173	0	26.39	0	26.683	0
166	2016-05-27 05:00:00	27.173	0	27.272	0	27.173	0	26.879	0	27.567	0	27.272	0	26.39	0	26.683	0
167	2016-05-27 06:00:00	27.173	0	27.272	0	27.173	0	26.781	0	27.567	0	27.272	0	26.39	0	26.683	0
168	2016-05-27 07:00:00	27.173	3961.1	27.567	6200	27.173	7577.8	26.781	1722.2	27.567	4477.8	27.173	12400.1	26.39	10677.8	26.683	11711.2
169	2016-05-27 08:00:00	27.173	3616.7	27.567	6200	27.567	8266.7	27.272	1808.3	27.567	2927.8	27.37	13089	26.977	11022.3	27.173	12400.1
170	2016-05-27 09:00:00	27.468	3100	27.665	6200	27.468	8266.7	27.468	1722.2	27.567	4994.5	27.567	12400.1	27.272	11022.3	27.37	8611.2
171	2016-05-27 10:00:00	27.468	3272.2	27.862	6200	27.567	5511.1	27.665	1808.3	27.567	3444.5	27.665	14466.8	27.468	10677.8	27.567	7577.8
172	2016-05-27 11:00:00	27.665	6200	28.06	6200	27.764	6200	27.862	1808.3	27.567	3444.5	27.862	14466.8	27.665	10677.8	27.764	7233.4
173	2016-05-27 12:00:00	27.862	4305.6	28.258	6200	27.961	6544.5	28.06	1722.2	27.567	3444.5	28.06	14466.8	27.862	10677.8	27.961	11711.2
174	2016-05-27 13:00:00	27.961	4650	28.258	7233.4	28.06	5511.1	28.258	1808.3	27.567	3444.5	28.258	13777.9	28.06	10333.4	28.159	11022.3
175	2016-05-27 14:00:00	28.06	2583.4	28.456	6544.5	28.258	5511.1	28.258	1722.2	27.567	3272.2	28.357	14466.8	28.159	10677.8	28.258	11711.2
176	2016-05-27 15:00:00	27.961	0	27.862	0	28.06	0	27.961	0	27.567	0	28.456	0	27.862	0	28.159	0
177	2016-05-27 16:00:00	27.665	0	27.665	0	27.764	0	27.764	0	27.567	0	28.06	0	27.665	0	27.862	0
178	2016-05-27 17:00:00	27.862	3100	28.159	9300.1	28.06	7233.4	28.06	1894.5	27.567	3444.5	27.862	12400.1	27.862	8266.7	27.961	12400.1
179	2016-05-27 18:00:00	28.06	3444.5	28.357	8611.2	28.258	7233.4	28.258	1980.6	27.567	4477.8	28.258	13089	28.06	2669.5	28.258	11022.3
180	2016-05-27 19:00:00	28.159	0	28.357	0	28.357	0	28.357	0	27.567	0	28.357	0	28.06	0	28.357	0
181	2016-05-27 20:00:00	28.159	0	28.357	0	28.357	0	28.357	0	27.567	0	28.456	0	28.06	0	28.357	0
182	2016-05-27 21:00:00	27.862	0	27.764	0	27.961	0	27.961	0	27.567	0	28.456	0	27.862	0	28.06	0
183	2016-05-27 22:00:00	27.37	0	27.272	0	27.468	0	27.468	0	27.567	0	27.961	0	27.272	0	27.567	0
184	2016-05-27 23:00:00	27.173	0	27.075	0	27.075	0	27.075	0	27.567	0	27.468	0	26.977	0	27.173	0
185	2016-05-28	27.272	0	27.075	0	27.173	0	26.781	0	27.567	0	27.075	0	26.683	0	26.879	0
186	2016-05-28 01:00:00	27.272	0	27.075	0	27.173	0	26.879	0	27.567	0	26.879	0	26.585	0	26.781	0
187	2016-05-28 02:00:00	27.173	0	27.075	0	27.173	0	26.879	0	27.567	0	26.781	0	26.488	0	26.683	0
188	2016-05-28 03:00:00	27.075	0	27.173	0	27.272	0	26.879	0	27.567	0	26.879	0	26.488	0	26.683	0
189	2016-05-28 04:00:00	27.272	0	27.075	0	27.272	0	26.879	0	27.567	0	26.683	0	26.488	0	26.683	0
190	2016-05-28 05:00:00	27.075	0	27.173	0	27.272	0	26.781	0	27.567	0	26.879	0	26.488	0	26.683	0
191	2016-05-28 06:00:00	27.272	0	27.173	0	27.272	0	26.879	0	27.567	0	26.879	0	26.488	0	26.683	0
192	2016-05-28 07:00:00	27.272	3444.5	27.075	9300.1	27.272	6544.5	26.879	1894.5	27.567	3616.7	26.879	11711.2	26.488	7577.8	26.683	11711.2
193	2016-05-28 08:00:00	27.173	5166.7	27.075	9300.1	27.173	6544.5	26.879	1894.5	27.567	4822.3	26.879	12400.1	26.488	7577.8	26.683	11711.2
194	2016-05-28 09:00:00	27.37	3788.9	27.468	9300.1	27.468	6544.5	27.173	1980.6	27.567	3100	26.977	10232.8	26.781	7577.8	26.879	11711.2
195	2016-05-28 10:00:00	27.37	2755.6	27.665	8611.2	27.567	7577.8	27.468	2066.7	27.567	2755.6	27.37	14466.8	27.272	7577.8	27.37	11711.2
196	2016-05-28 11:00:00	27.665	3272.2	27.961	8611.2	27.862	7577.8	27.764	1980.6	27.567	3272.2	27.665	13089	27.567	7577.8	27.764	11022.3
197	2016-05-28 12:00:00	27.961	2238.9	28.159	8611.2	28.06	7577.8	28.06	1894.5	27.567	2755.6	27.961	12400.1	27.862	7577.8	27.961	11711.2
198	2016-05-28 13:00:00	28.159	3272.2	28.357	8611.2	28.258	7577.8	28.258	1894.5	27.567	3788.9	28.258	14466.8	28.06	7233.4	28.258	11711.2
199	2016-05-28 14:00:00	28.357	3444.5	28.555	8611.2	28.456	7577.8	28.456	1894.5	27.567	2497.2	28.456	14466.8	28.258	7233.4	28.456	11711.2
200	2016-05-28 15:00:00	28.456	2927.8	28.655	8611.2	28.555	7577.8	28.555	1808.3	27.567	4650	28.655	17911.2	28.357	7233.4	28.555	11711.2
201	2016-05-28 16:00:00	28.555	3444.5	28.754	8611.2	28.655	7577.8	28.655	1980.6	27.567	3444.5	28.754	14466.8	28.456	7233.4	28.655	11022.3
202	2016-05-28 17:00:00	28.655	2927.8	28.853	8611.2	28.754	7233.4	28.754	1722.2	27.567	3788.9	28.754	15155.7	28.555	7233.4	28.754	11022.3
203	2016-05-28 18:00:00	28.655	3272.2	28.853	8611.2	28.853	7577.8	28.853	2066.7	27.567	6200	28.953	12400.1	28.555	7233.4	28.853	11022.3
204	2016-05-28 19:00:00	28.655	0	28.853	0	28.853	0	28.853	0	27.567	0	28.953	0	28.655	0	28.853	0
205	2016-05-28 20:00:00	28.655	0	28.754	0	28.853	0	28.754	0	27.567	0	28.953	0	28.555	0	28.754	0
206	2016-05-28 21:00:00	28.357	0	28.159	0	28.456	0	28.357	0	27.567	0	28.953	0	28.258	0	28.555	0
207	2016-05-28 22:00:00	27.764	0	27.567	0	27.862	0	27.764	0	27.567	0	28.357	0	27.665	0	27.961	0
208	2016-05-28 23:00:00	27.272	0	27.173	0	27.37	0	27.37	0	27.567	0	27.764	0	27.272	0	27.468	0
209	2016-05-29	27.075	0	27.173	0	27.075	0	26.977	0	27.567	0	27.37	0	26.977	0	27.075	0
210	2016-05-29 01:00:00	27.075	0	27.173	0	27.272	0	26.781	0	27.567	0	27.075	0	26.781	0	26.977	0
211	2016-05-29 02:00:00	27.173	0	27.173	0	27.173	0	26.781	0	27.567	0	26.977	0	26.683	0	26.879	0
212	2016-05-29 03:00:00	27.173	0	27.075	0	27.272	0	26.781	0	27.567	0	27.075	0	26.683	0	26.879	0
213	2016-05-29 04:00:00	27.075	0	27.173	0	27.075	0	26.879	0	27.567	0	26.977	0	26.683	0	26.879	0
214	2016-05-29 05:00:00	27.173	0	27.075	0	27.173	0	26.879	0	27.567	0	26.977	0	26.683	0	26.781	0
215	2016-05-29 06:00:00	27.173	0	27.173	0	27.173	0	26.879	0	27.567	0	27.075	0	26.683	0	26.781	0
216	2016-05-29 07:00:00	27.173	4305.6	27.173	8611.2	27.272	7233.4	26.781	1808.3	27.567	3100	27.173	14466.8	26.683	7233.4	26.879	11022.3
217	2016-05-29 08:00:00	27.272	3272.2	27.173	8611.2	27.173	7233.4	26.781	1980.6	27.567	2927.8	27.075	13089	26.683	7233.4	26.879	11022.3
218	2016-05-29 09:00:00	27.468	3616.7	27.468	9300.1	27.468	7233.4	27.173	1980.6	27.567	4477.8	27.075	1410.8	26.977	7233.4	27.075	11711.2
219	2016-05-29 10:00:00	27.567	3272.2	27.862	8611.2	27.665	7577.8	27.567	2066.7	27.567	3788.9	27.468	13089	27.468	7233.4	27.567	11022.3
220	2016-05-29 11:00:00	27.862	2755.6	28.06	9300.1	27.961	6544.5	27.961	1980.6	27.567	3616.7	27.862	15155.7	27.764	7577.8	27.862	11022.3
221	2016-05-29 12:00:00	28.159	3444.5	28.456	9300.1	28.357	6544.5	28.258	1980.6	27.567	3961.1	28.159	14466.8	28.06	7577.8	28.258	11022.3
222	2016-05-29 13:00:00	28.456	2755.6	28.655	9300.1	28.555	7233.4	28.555	2066.7	27.567	3961.1	28.456	14466.8	28.357	7577.8	28.456	11022.3
223	2016-05-29 14:00:00	28.555	3616.7	28.754	9300.1	28.655	7233.4	28.655	1894.5	27.567	3444.5	28.655	12400.1	28.456	7577.8	28.555	11711.2
224	2016-05-29 15:00:00	28.754	3272.2	28.953	9644.5	28.853	7233.4	28.853	1894.5	27.567	2583.4	28.853	15155.7	28.655	7577.8	28.754	11022.3
225	2016-05-29 16:00:00	29.053	3788.9	29.152	9300.1	29.053	7233.4	29.053	1894.5	27.567	3616.7	29.053	14466.8	28.853	6544.5	29.053	11711.2
226	2016-05-29 17:00:00	29.252	3616.7	29.352	9300.1	29.252	6544.5	29.252	1980.6	27.567	2411.1	29.252	10677.8	29.053	6200	29.252	11022.3
227	2016-05-29 18:00:00	29.352	3616.7	29.452	8611.2	29.452	6544.5	29.452	1980.6	27.567	4305.6	29.452	13089	29.252	6200	29.452	11022.3
228	2016-05-29 19:00:00	29.452	0	29.352	0	29.452	0	29.452	0	27.567	0	29.552	0	29.252	0	29.452	0
229	2016-05-29 20:00:00	29.252	0	29.152	0	29.252	0	29.352	0	27.567	0	29.552	0	29.053	0	29.352	0
230	2016-05-29 21:00:00	28.655	0	28.357	0	28.754	0	28.754	0	27.567	0	29.352	0	28.555	0	28.853	0
231	2016-05-29 22:00:00	27.961	0	27.764	0	28.06	0	28.06	0	27.567	0	28.655	0	27.961	0	28.159	0
232	2016-05-29 23:00:00	27.567	0	27.468	0	27.567	0	27.567	0	27.567	0	28.06	0	27.468	0	27.665	0
233	2016-05-30	27.272	0	27.272	0	27.37	0	27.272	0	27.567	0	27.567	0	27.272	0	27.468	0
234	2016-05-30 01:00:00	27.173	0	27.173	0	27.272	0	27.173	0	27.567	0	27.37	0	27.173	0	27.272	0
235	2016-05-30 02:00:00	27.173	0	27.075	0	27.173	0	27.075	0	27.567	0	27.272	0	27.075	0	27.173	0
236	2016-05-30 03:00:00	27.173	0	27.075	0	27.173	0	26.977	0	27.567	0	27.173	0	26.977	0	27.075	0
237	2016-05-30 04:00:00	27.075	0	27.075	0	27.173	0	26.977	0	27.567	0	27.075	0	26.977	0	27.075	0
238	2016-05-30 05:00:00	27.173	0	27.075	0	27.173	0	26.977	0	27.567	0	27.075	0	26.977	0	27.075	0
239	2016-05-30 06:00:00	27.173	0	27.075	0	27.173	0	26.977	0	27.567	0	27.075	0	26.977	0	27.075	0
240	2016-05-30 07:00:00	27.075	3616.7	29.352	8611.2	29.452	6544.5	29.452	2066.7	27.567	3100	29.552	10677.8	29.252	6200	29.452	11022.3
241	2016-05-30 08:00:00	27.075	3788.9	29.152	8266.7	29.252	6544.5	29.352	1980.6	27.567	3616.7	29.552	13089	29.053	6200	29.352	11022.3
242	2016-05-30 09:00:00	27.37	107.6	27.567	8266.7	27.37	7233.4	27.272	1894.5	27.468	3616.7	26.977	12400.1	27.173	6200	27.173	11711.2
243	2016-05-30 10:00:00	27.665	107.6	27.862	9300.1	27.764	7233.4	27.764	1980.6	27.468	3272.2	27.468	15155.7	27.567	6200	27.665	10677.8
244	2016-05-30 11:00:00	27.862	96.9	28.06	9644.5	27.961	7577.8	27.961	1980.6	27.567	3961.1	27.961	13777.9	27.764	10333.4	27.961	11711.2
245	2016-05-30 12:00:00	27.961	107.6	28.06	8611.2	28.06	7577.8	28.06	1980.6	27.468	3444.5	28.06	13777.9	27.862	10333.4	28.06	11711.2
246	2016-05-30 13:00:00	28.159	96.9	28.258	9300.1	28.159	8266.7	28.159	1980.6	27.468	3788.9	28.258	13089	27.961	10333.4	28.159	11711.2
247	2016-05-30 14:00:00	28.258	96.9	28.357	9300.1	28.258	8266.7	28.258	1980.6	27.468	3616.7	28.258	13777.9	28.06	10333.4	28.258	11022.3
248	2016-05-30 15:00:00	28.357	107.6	28.456	9300.1	28.357	8266.7	28.357	2066.7	27.468	3788.9	28.357	15844.5	28.258	10333.4	28.357	11711.2
249	2016-05-30 16:00:00	28.456	107.6	28.555	9300.1	28.555	8266.7	28.456	2066.7	27.468	2927.8	28.555	15155.7	28.357	10333.4	28.456	11711.2
250	2016-05-30 17:00:00	28.555	107.6	28.655	9300.1	28.555	8266.7	28.555	1980.6	27.468	3100	28.555	12400.1	28.357	10333.4	28.555	11711.2
251	2016-05-30 18:00:00	28.555	96.9	28.655	8611.2	28.655	8266.7	28.655	1980.6	27.468	3272.2	28.655	13089	28.456	10333.4	28.555	11022.3
252	2016-05-30 19:00:00	28.555	107.6	28.655	9300.1	28.655	8266.7	28.655	1894.5	27.468	3444.5	28.754	13089	28.456	10333.4	28.655	11711.2
253	2016-05-30 20:00:00	28.655	0	28.655	0	28.655	0	28.754	0	27.468	0	28.853	0	28.456	0	28.655	11022.3
254	2016-05-30 21:00:00	28.357	0	28.06	0	28.357	0	28.357	0	27.468	0	28.853	0	28.258	0	28.456	0
255	2016-05-30 22:00:00	27.764	0	27.665	0	27.862	0	27.764	0	27.468	0	28.258	0	27.665	0	27.862	0
256	2016-05-30 23:00:00	27.272	0	27.272	0	27.37	0	27.37	0	27.468	0	27.764	0	27.272	0	27.468	0
257	2016-05-31	27.075	0	27.075	0	27.173	0	27.075	0	27.468	0	27.37	0	26.977	0	27.173	0
258	2016-05-31 01:00:00	27.173	0	27.173	0	27.173	0	26.879	0	27.37	0	27.075	0	26.781	0	26.977	0
259	2016-05-31 02:00:00	27.173	0	27.173	0	27.075	0	26.781	0	27.37	0	26.977	0	26.683	0	26.879	0
260	2016-05-31 03:00:00	27.075	0	27.173	0	27.173	0	26.781	0	27.37	0	26.781	0	26.683	0	26.781	0
261	2016-05-31 04:00:00	27.173	0	27.075	0	27.173	0	26.879	0	27.37	0	26.781	0	26.683	0	26.781	0
262	2016-05-31 05:00:00	27.075	0	27.075	0	27.272	0	26.879	0	27.37	0	26.781	0	26.683	0	26.781	0
263	2016-05-31 06:00:00	27.173	0	27.173	0	27.272	0	26.781	0	27.37	0	26.879	0	26.683	0	26.781	0
264	2016-05-31 07:00:00	27.173	0	27.173	0	27.173	0	26.781	0	27.37	0	26.781	0	26.585	0	26.781	0
265	2016-05-31 08:00:00	27.075	3616.7	27.173	8611.2	28.655	7577.8	28.754	1894.5	27.468	3272.2	28.853	13777.9	28.456	10333.4	28.655	11022.3
266	2016-05-31 09:00:00	27.468	3788.9	27.37	8266.7	27.37	8266.7	27.075	1894.5	27.272	3961.1	26.683	3100	26.879	10333.4	26.879	11022.3
267	2016-05-31 10:00:00	27.468	2583.4	27.567	8611.2	27.567	8611.2	27.468	1894.5	27.272	5166.7	27.173	13777.9	27.272	10677.8	27.37	11022.3
268	2016-05-31 11:00:00	27.665	4133.4	27.665	8266.7	27.665	150.7	27.665	2066.7	27.272	3272.2	27.665	15844.5	27.567	10333.4	27.665	2755.6
269	2016-05-31 12:00:00	27.468	3616.7	27.468	8266.7	27.468	139.9	27.567	1980.6	27.272	3961.1	27.764	12400.1	27.468	9644.5	27.468	2927.8
270	2016-05-31 13:00:00	27.37	3961.1	27.272	8266.7	27.37	150.7	27.37	2066.7	27.272	5511.1	27.665	12400.1	27.272	9644.5	27.37	2755.6
271	2016-05-31 14:00:00	27.37	3616.7	27.37	8266.7	27.468	139.9	27.37	2066.7	27.272	2755.6	27.567	12400.1	27.272	9644.5	27.272	3444.5
272	2016-05-31 15:00:00	27.37	3444.5	27.37	667.4	27.37	150.7	27.37	1980.6	27.173	2066.7	27.468	13089	27.272	9644.5	27.272	2927.8
273	2016-05-31 16:00:00	27.37	3100	27.468	688.9	27.37	118.4	27.37	1894.5	27.272	4305.6	27.468	13089	27.37	9644.5	27.37	2755.6
274	2016-05-31 17:00:00	27.468	3272.2	27.567	570.5	27.468	118.4	27.468	1894.5	27.173	3616.7	27.468	11711.2	27.468	9644.5	27.468	5511.1
275	2016-05-31 18:00:00	27.468	3193.8	27.567	570.5	27.567	118.4	27.567	1894.5	27.173	2583.4	27.567	13089	27.468	9644.5	27.468	3788.9
276	2016-05-31 19:00:00	27.468	3161.5	27.468	538.2	27.567	118.4	27.468	1894.5	27.173	2669.5	27.567	13089	27.468	9644.5	27.468	2497.2
277	2016-05-31 20:00:00	27.468	0	27.468	0	27.468	0	27.468	0	27.173	0	27.567	0	27.37	0	27.37	0
278	2016-05-31 21:00:00	27.173	0	27.075	0	27.173	0	27.075	0	27.173	0	27.468	0	26.977	0	27.173	0
279	2016-05-31 22:00:00	27.173	0	27.173	0	27.272	0	26.781	0	27.173	0	26.977	0	26.488	0	26.683	0
280	2016-05-31 23:00:00	27.173	0	27.173	0	27.173	0	26.977	0	27.173	0	26.781	0	26.488	0	26.585	0
281	2016-06-01	27.173	0	27.173	0	27.173	0	26.879	0	27.173	0	26.879	0	26.585	0	26.683	0
282	2016-06-01 01:00:00	27.272	0	27.173	0	27.37	0	26.977	0	27.173	0	26.879	0	26.488	0	26.781	0
283	2016-06-01 02:00:00	27.173	0	27.173	0	27.272	0	26.879	0	27.173	0	26.879	0	26.488	0	26.683	0
284	2016-06-01 03:00:00	27.272	0	27.075	0	27.173	0	26.879	0	27.173	0	26.781	0	26.488	0	26.683	0
285	2016-06-01 04:00:00	27.173	0	27.173	0	27.37	0	26.781	0	27.075	0	26.977	0	26.585	0	26.683	0
286	2016-06-01 05:00:00	27.272	0	27.173	0	27.272	0	26.879	0	27.173	0	26.879	0	26.488	0	26.781	0
287	2016-06-01 06:00:00	27.173	0	27.173	0	27.173	0	26.781	0	27.075	0	26.879	0	26.488	0	26.683	0
288	2016-06-01 07:00:00	27.272	0	27.173	0	27.37	0	26.879	0	27.075	0	26.879	0	26.585	0	26.683	0
289	2016-06-01 08:00:00	27.272	2755.6	27.468	527.4	27.468	118.4	27.468	1808.3	27.173	4994.5	27.567	10333.4	27.37	9300.1	27.37	2583.4
290	2016-06-01 09:00:00	27.37	3788.9	27.37	602.8	27.37	118.4	27.173	1980.6	27.075	3444.5	26.781	12400.1	26.781	9644.5	26.781	2583.4
291	2016-06-01 10:00:00	27.468	3444.5	27.37	2669.5	27.37	118.4	27.173	1894.5	27.075	2755.6	27.075	12400.1	27.075	10333.4	27.075	2583.4
292	2016-06-01 11:00:00	27.468	3272.2	27.665	4133.4	27.468	86.1	27.468	1980.6	27.075	3788.9	27.272	12400.1	27.468	9644.5	27.37	2152.8
293	2016-06-01 12:00:00	27.764	3100	27.862	4305.6	27.764	86.1	27.764	1980.6	27.075	3100	27.567	11022.3	27.665	9300.1	27.665	2411.1
294	2016-06-01 13:00:00	27.961	3272.2	28.06	3961.1	27.961	86.1	28.06	1980.6	27.075	2927.8	27.862	11711.2	27.961	9644.5	27.961	2325
295	2016-06-01 14:00:00	28.258	3272.2	28.456	3961.1	28.258	86.1	28.258	1894.5	27.075	2927.8	28.159	11711.2	28.258	9644.5	28.258	2152.8
296	2016-06-01 15:00:00	28.456	3616.7	28.655	1980.6	28.456	86.1	28.555	1980.6	27.075	3444.5	28.357	14466.8	28.456	9644.5	28.456	1980.6
297	2016-06-01 16:00:00	28.655	5511.1	28.754	1980.6	28.655	86.1	28.655	1894.5	27.075	3100	28.655	11711.2	28.655	9644.5	28.655	2238.9
298	2016-06-01 17:00:00	28.853	3444.5	28.853	1808.3	28.754	86.1	28.853	1894.5	27.075	3444.5	28.754	11711.2	28.754	9644.5	28.754	2325
299	2016-06-01 18:00:00	28.853	3616.7	28.853	1808.3	28.853	86.1	28.853	1808.3	27.075	2583.4	28.853	12400.1	28.853	9300.1	28.853	2152.8
300	2016-06-01 19:00:00	28.754	0	28.754	0	28.853	0	28.853	0	27.075	0	28.953	0	28.754	0	28.754	0
301	2016-06-01 20:00:00	28.456	0	28.258	0	28.555	0	28.456	0	27.075	0	28.853		28.357	0	28.555	0
302	2016-06-01 21:00:00	27.862	0	27.764	0	27.961	0	27.961	0	27.075	0	28.357	0	27.862	0	28.06	0
303	2016-06-01 22:00:00	27.567	0	27.468	0	27.665	0	27.567	0	27.075	0	27.961	0	27.567	0	27.665	0
304	2016-06-01 23:00:00	27.272	0	27.272	0	27.37	0	27.37	0	27.075	0	27.567	0	27.272	0	27.468	0
305	2016-06-02	27.075	0	27.075	0	27.173	0	27.173	0	27.075	0	27.37	0	27.075	0	27.173	0
306	2016-06-02 01:00:00	27.075	0	27.075	0	27.272	0	26.977	0	27.075	0	27.173	0	26.977	0	27.075	0
307	2016-06-02 02:00:00	27.173	0	27.075	0	27.173	0	26.879	0	27.075	0	27.075	0	26.879	0	26.977	0
308	2016-06-02 03:00:00	27.075	0	27.075	0	27.173	0	26.879	0	27.075	0	26.977	0	26.879	0	26.977	0
309	2016-06-02 04:00:00	27.075	0	27.075	0	27.075	0	26.781	0	27.075	0	26.977	0	26.781	0	26.879	0
310	2016-06-02 05:00:00	27.173	0	27.075	0	27.272	0	26.781	0	27.075	0	26.879	0	26.781	0	26.879	0
311	2016-06-02 06:00:00	27.173	0	27.075	0	27.173	0	26.781	0	27.075	0	26.879	0	26.781	0	26.879	0
312	2016-06-02 07:00:00	28.853	3100	28.853	1894.5	28.853	96.9	28.853	1980.6	27.075	3961.1	28.953	12400.1	28.853	9644.5	28.853	2238.9
313	2016-06-02 08:00:00	27.173	2411.1	28.754	1894.5	28.853	3616.7	28.853	1894.5	27.075	3616.7	28.953	12400.1	28.754	9644.5	28.754	2152.8
314	2016-06-02 09:00:00	27.468	3444.5	27.468	2066.7	27.37	4305.6	27.075	1980.6	27.075	2755.6	26.879	0	27.075	10333.4	26.977	2411.1
315	2016-06-02 10:00:00	27.665	3616.7	27.764	2927.8	27.567	3444.5	27.567	1980.6	27.075	2927.8	27.272	11022.3	27.567	10333.4	27.468	2411.1
316	2016-06-02 11:00:00	27.862	2755.6	27.961	2927.8	27.862	3616.7	27.862	1894.5	27.075	3788.9	27.764	11022.3	27.862	10333.4	27.862	2411.1
317	2016-06-02 12:00:00	28.06	4477.8	28.159	2927.8	28.06	2755.6	28.06	1894.5	27.075	3444.5	27.961	11711.2	28.06	10333.4	28.06	2411.1
318	2016-06-02 13:00:00	28.159	3616.7	28.258	2927.8	28.159	3616.7	28.159	1980.6	27.075	5338.9	28.159	13089	28.159	10333.4	28.159	2411.1
319	2016-06-02 14:00:00	28.258	3272.2	28.357	3100	28.258	5338.9	28.258	1980.6	27.075	3616.7	28.258	12400.1	28.258	10333.4	28.258	2411.1
320	2016-06-02 15:00:00	28.357	2927.8	28.456	2927.8	28.357	3100	28.357	1894.5	27.075	2755.6	28.357	14466.8	28.357	9644.5	28.357	2411.1
321	2016-06-02 16:00:00	28.456	3100	28.555	4133.4	28.456	3788.9	28.456	1722.2	27.075	2755.6	28.456	12400.1	28.357	10333.4	28.456	4133.4
322	2016-06-02 17:00:00	28.754	3100	28.853	8266.7	28.754	3444.5	28.754	1894.5	27.075	2583.4	28.555	14466.8	28.754	10333.4	28.754	3616.7
323	2016-06-02 18:00:00	28.555	2669.5	28.357	8611.2	28.555	2755.6	28.555	1980.6	27.075	3444.5	28.853	12400.1	28.555	9644.5	28.555	3444.5
324	2016-06-02 19:00:00	28.06	0	27.173	0	27.272	0	27.173	0	27.075	0	27.764	0	27.075	0	27.272	0
325	2016-06-02 20:00:00	27.764	0	27.173	0	27.173	0	26.879	0	27.075	0	27.075	0	26.585	0	26.781	0
326	2016-06-02 21:00:00	27.173	0	27.173	0	27.37	0	26.879	0	27.075	0	26.977	0	26.488	0	26.585	0
327	2016-06-02 22:00:00	27.173	0	27.173	0	27.37	0	26.879	0	27.075	0	26.879	0	26.488	0	26.781	0
328	2016-06-02 23:00:00	27.173	0	27.075	0	27.37	0	26.781	0	27.075	0	26.977	0	26.488	0	26.683	0
329	2016-06-03	27.272	0	27.173	0	27.272	0	26.879	0	27.075	0	26.977	0	26.488	0	26.585	0
330	2016-06-03 01:00:00	27.173	0	27.173	0	27.272	0	26.781	0	27.075	0	26.977	0	26.488	0	26.683	0
331	2016-06-03 02:00:00	27.173	0	27.173	0	27.173	0	26.879	0	27.075	0	26.977	0	26.488	0	26.683	0
332	2016-06-03 03:00:00	27.173	0	27.173	0	27.173	0	26.879	0	27.075	0	26.977	0	26.488	0	26.585	0
333	2016-06-03 04:00:00	27.272	0	27.173	0	27.173	0	26.879	0	27.075	0	26.879	0	26.488	0	26.683	0
334	2016-06-03 05:00:00	27.173	0	27.075	0	27.173	0	26.879	0	27.075	0	26.879	0	26.488	0	26.585	0
335	2016-06-03 06:00:00	27.272	0	27.173	0	27.272	0	26.781	0	27.075	0	26.977	0	26.488	0	26.683	0
336	2016-06-03 07:00:00	27.173	3616.7	27.961	8611.2	28.159	3100	28.159	1980.6	27.075	2927.8	28.555	10333.4	28.06	10333.4	28.159	2238.9
337	2016-06-03 08:00:00	27.173	3444.5	27.567	8611.2	27.764	107.6	27.764	1980.6	27.075	2927.8	28.06	12400.1	27.665	10333.4	27.764	2325
338	2016-06-03 09:00:00	27.272	3961.1	27.468	8266.7	27.468	129.2	27.075	2066.7	27.075	4822.3	26.879	4822.3	26.781	10677.8	26.781	10677.8
339	2016-06-03 10:00:00	27.37	5166.7	27.468	5166.7	27.37	86.1	27.173	1980.6	27.075	3272.2	27.173	10677.8	27.173	11022.3	27.173	10677.8
340	2016-06-03 11:00:00	27.37	3788.9	27.665	5166.7	27.468	86.1	27.37	1980.6	27.075	2066.7	27.37	13089	27.37	10677.8	27.468	10677.8
341	2016-06-03 12:00:00	27.665	3616.7	27.961	5166.7	27.665	86.1	27.567	64.6	27.075	2927.8	27.665	11022.3	27.665	10333.4	27.764	14466.8
342	2016-06-03 13:00:00	27.961	3444.5	28.159	5166.7	27.961	86.1	27.862	64.6	27.075	2583.4	27.961	12400.1	27.961	9644.5	27.961	6544.5
343	2016-06-03 14:00:00	28.159	4305.6	28.357	5511.1	28.159	14466.8	28.06	64.6	27.075	3961.1	28.159	12400.1	28.159	10333.4	28.159	6544.5
344	2016-06-03 15:00:00	28.258	3961.1	28.456	5166.7	28.258	96.9	28.159	64.6	27.075	3616.7	28.357	12400.1	28.258	9644.5	28.357	6544.5
345	2016-06-03 16:00:00	28.06	0	28.06	0	28.159	0	28.06	0	27.075	0	28.555	0	28.06	0	28.258	0
346	2016-06-03 17:00:00	27.862	3616.7	27.862	4305.6	27.862	4477.8	27.862	3788.9	27.075	3616.7	28.06	12400.1	27.567	3788.9	27.961	3272.2
347	2016-06-03 18:00:00	27.764	3961.1	27.665	5166.7	27.764	3100	27.764	3961.1	27.075	6200	27.961	3788.9	27.665	4305.6	27.862	5166.7
348	2016-06-03 19:00:00	27.567	0	27.173	0	27.37	0	27.272	0	27.075	0	27.468	0	27.173	0	27.37	0
349	2016-06-03 20:00:00	27.468	0	27.075	0	27.173	0	26.781	0	27.075	0	27.075	0	26.585	0	26.781	0
350	2016-06-03 21:00:00	27.37	0	27.173	0	27.173	0	26.879	0	27.075	0	26.879	0	26.488	0	26.683	0
351	2016-06-03 22:00:00	27.272	0	27.173	0	27.272	0	26.781	0	27.075	0	26.879	0	26.488	0	26.585	0
352	2016-06-03 23:00:00	27.272	0	27.075	0	27.272	0	26.879	0	27.075	0	26.879	0	26.585	0	26.585	0
353	2016-06-04	27.272	0	27.173	0	27.173	0	26.879	0	27.075	0	26.977	0	26.488	0	26.683	0
354	2016-06-04 01:00:00	27.173	0	27.173	0	27.173	0	26.879	0	27.075	0	26.879	0	26.488	0	26.585	0
355	2016-06-04 02:00:00	27.173	0	27.075	0	27.173	0	26.879	0	27.075	0	26.879	0	26.488	0	26.585	0
356	2016-06-04 03:00:00	27.272	0	27.173	0	27.173	0	26.781	0	27.075	0	26.879	0	26.39	0	26.683	0
357	2016-06-04 04:00:00	27.075	0	27.075	0	27.173	0	26.879	0	27.075	0	26.977	0	26.488	0	26.585	0
358	2016-06-04 05:00:00	27.272	0	27.173	0	27.272	0	26.781	0	27.075	0	26.977	0	26.39	0	26.585	0
359	2016-06-04 06:00:00	27.173	0	27.075	0	27.272	0	26.879	0	27.075	0	26.879	0	26.585	0	26.683	0
360	2016-06-04 07:00:00	27.272	11022.3	27.173	11022.3	27.173	2411.1	26.879	2411.1	27.075	3444.5	26.879	559.7	26.488	473.6	26.585	5166.7
361	2016-06-04 08:00:00	27.173	9644.5	27.468	11022.3	27.665	3272.2	27.567	2066.7	27.075	3100	27.862	570.5	27.468	462.9	27.665	5338.9
362	2016-06-04 09:00:00	27.075	10677.8	27.272	11711.2	27.468	2066.7	27.468	2325	27.075	2927.8	27.665	559.7	27.272	462.9	27.567	5166.7
363	2016-06-04 10:00:00	27.075	9300.1	27.272	13089	27.37	3788.9	27.37	3272.2	27.075	3444.5	27.567	527.4	27.272	462.9	27.468	4994.5
364	2016-06-04 11:00:00	27.272	9300.1	27.173	12400.1	27.272	2238.9	27.075	2325	27.075	2755.6	27.075	505.9	26.977	484.4	27.075	4477.8
365	2016-06-04 12:00:00	27.37	10677.8	27.37	9644.5	27.468	1216.3	27.37	2669.5	27.075	3100	27.272	516.7	27.272	484.4	27.37	4822.3
366	2016-06-04 13:00:00	27.567	9644.5	27.567	11022.3	27.567	1097.9	27.567	2755.6	27.173	2669.5	27.468	527.4	27.468	495.1	27.567	4477.8
367	2016-06-04 14:00:00	27.665	8266.7	27.764	7577.8	27.764	11022.3	27.665	2152.8	27.272	2325	27.665	527.4	27.665	301.4	27.665	4650
368	2016-06-04 15:00:00	27.862	11711.2	27.862	12400.1	27.961	10677.8	27.862	3100	27.272	2927.8	27.862	516.7	27.764	301.4	27.862	4822.3
369	2016-06-04 16:00:00	27.961	9644.5	27.961	10677.8	28.06	11711.2	27.961	2497.2	27.272	2497.2	27.961	527.4	27.961	312.2	27.961	4994.5
370	2016-06-04 17:00:00	28.06	10677.8	28.06	10333.4	28.159	11711.2	28.06	2411.1	27.272	2755.6	28.159	538.2	28.06	312.2	28.06	5338.9
371	2016-06-04 18:00:00	28.159	11711.2	28.06	17222.3	28.159	10333.4	28.159	2411.1	27.272	2583.4	28.258	527.4	28.159	312.2	28.159	5166.7
372	2016-06-04 19:00:00	28.159	0	27.567	0	27.961	0	27.862	0	27.272	0	28.159	0	27.862	0	27.961	0
373	2016-06-04 20:00:00	28.06	0	27.173	0	27.173	0	27.173	0	27.272	0	27.665	0	27.173	0	27.272	0
374	2016-06-04 21:00:00	27.961	0	27.173	0	27.173	0	26.879	0	27.272	0	27.075	0	26.683	0	26.781	0
375	2016-06-04 22:00:00	27.862	0	27.075	0	27.173	0	26.781	0	27.272	0	26.781	0	26.488	0	26.585	0
376	2016-06-04 23:00:00	27.075	0	27.173	0	27.173	0	26.781	0	27.272	0	26.781	0	26.39	0	26.585	0
377	2016-06-05	27.272	0	27.173	0	27.173	0	26.781	0	27.272	0	26.781	0	26.585	0	26.585	0
378	2016-06-05 01:00:00	27.272	0	27.173	0	27.173	0	26.781	0	27.272	0	26.781	0	26.39	0	26.585	0
379	2016-06-05 02:00:00	27.173	0	27.075	0	27.272	0	26.879	0	27.272	0	26.781	0	26.488	0	26.585	0
380	2016-06-05 03:00:00	27.272	0	27.173	0	27.272	0	26.781	0	27.272	0	26.683	0	26.488	0	26.585	0
381	2016-06-05 04:00:00	27.272	0	27.173	0	27.173	0	26.879	0	27.272	0	26.683	0	26.488	0	26.683	0
382	2016-06-05 05:00:00	27.173	0	27.075	0	27.075	0	26.781	0	27.37	0	26.683	0	26.39	0	26.585	0
383	2016-06-05 06:00:00	27.173	0	27.173	0	27.272	0	26.879	0	27.37	0	26.683	0	26.488	0	26.585	0
384	2016-06-05 07:00:00	27.173	2325	28.06	1216.3	28.258	11711.2	28.159	13777.9	27.272	10333.4	28.258	12400.1	28.159	5166.7	28.159	4477.8
385	2016-06-05 08:00:00	27.272	2325	28.06	1097.9	28.159	2411.1	28.06	11711.2	27.272	11022.3	28.258	8611.2	28.06	4994.5	28.06	4477.8
386	2016-06-05 09:00:00	27.272	5166.7	27.961	11022.3	28.06	2066.7	28.06	11711.2	27.272	9300.1	28.159	13089	28.06	4822.3	28.06	4822.3
387	2016-06-05 10:00:00	27.173	2927.8	27.272	10677.8	27.173	2669.5	26.781	11022.3	27.37	11022.3	26.683	12400.1	26.488	4650	26.585	5677.8
388	2016-06-05 11:00:00	27.173	2411.1	27.173	3788.9	27.37	2755.6	27.075	10677.8	27.37	10333.4	26.977	16533.4	26.879	322.9	26.977	5166.7
389	2016-06-05 12:00:00	27.272	2238.9	27.272	2238.9	27.37	2152.8	27.272	9644.5	27.37	11711.2	27.272	11711.2	27.173	312.2	27.272	5338.9
390	2016-06-05 13:00:00	27.37	2583.4	27.37	2066.7	27.468	3100	27.37	10333.4	27.37	11022.3	27.468	14466.8	27.272	312.2	27.37	5338.9
391	2016-06-05 14:00:00	27.468	2497.2	27.468	9644.5	27.567	2497.2	27.468	11022.3	27.37	11022.3	27.567	14466.8	27.37	312.2	27.468	5338.9
392	2016-06-05 15:00:00	27.468	2583.4	27.468	13089	27.567	2411.1	27.468	10677.8	27.37	11711.2	27.665	9644.5	27.468	322.9	27.567	5338.9
393	2016-06-05 16:00:00	27.567	2927.8	27.567	11022.3	27.665	2411.1	27.567	10677.8	27.37	12400.1	27.665	11711.2	27.468	322.9	27.567	5338.9
394	2016-06-05 17:00:00	27.567	2152.8	27.567	11711.2	27.665	2411.1	27.567	10677.8	27.37	12400.1	27.764	10677.8	27.567	312.2	27.567	5166.7
395	2016-06-05 18:00:00	27.567	3788.9	27.567	10677.8	27.665	3272.2	27.567	10677.8	27.37	13089	27.764	10677.8	27.567	322.9	27.567	4994.5
396	2016-06-05 19:00:00	27.468	0	27.468	0	27.665	0	27.567	0	27.37	0	27.764	0	27.567	0	27.567	0
397	2016-06-05 20:00:00	27.468	0	27.173	0	27.37	0	27.37	0	27.37	0	27.567	0	27.37	0	27.37	0
398	2016-06-05 21:00:00	27.37	0	27.173	0	27.272	0	26.781	0	27.37	0	27.075	0	26.683	0	26.781	0
399	2016-06-05 22:00:00	27.272	0	27.173	0	27.173	0	26.781	0	27.37	0	26.781	0	26.488	0	26.585	0
400	2016-06-05 23:00:00	27.173	0	27.075	0	27.173	0	26.879	0	27.37	0	26.781	0	26.488	0	26.585	0
401	2016-06-06	27.173	0	27.173	0	27.173	0	26.879	0	27.37	0	26.781	0	26.39	0	26.585	0
402	2016-06-06 01:00:00	27.075	0	27.173	0	27.173	0	26.781	0	27.37	0	26.781	0	26.488	0	26.585	0
403	2016-06-06 02:00:00	27.272	0	27.075	0	27.272	0	26.879	0	27.37	0	26.683	0	26.585	0	26.585	0
404	2016-06-06 03:00:00	27.075	0	27.075	0	27.37	0	26.879	0	27.37	0	26.781	0	26.488	0	26.585	0
405	2016-06-06 04:00:00	27.272	0	27.173	0	27.272	0	26.879	0	27.37	0	26.781	0	26.585	0	26.585	0
406	2016-06-06 05:00:00	27.173	0	27.272	0	27.272	0	26.879	0	27.37	0	26.683	0	26.488	0	26.585	0
407	2016-06-06 06:00:00	27.173	0	27.173	0	27.173	0	26.879	0	27.37	0	26.781	0	26.488	0	26.585	0
408	2016-06-06 07:00:00	27.173	9300.1	27.173	12400.1	27.173	8611.2	26.977	11022.3	27.37	9300.1	26.781	9300.1	26.585	10677.8	26.585	11022.3
409	2016-06-06 08:00:00	27.272	10677.8	27.173	9644.5	27.173	13777.9	26.879	14466.8	27.37	10333.4	26.781	10333.4	26.488	10333.4	26.585	10333.4
410	2016-06-06 09:00:00	27.173	11022.3	27.173	11022.3	27.173	11711.2	26.977	10333.4	27.37	10333.4	26.781	12400.1	26.585	11711.2	26.585	11022.3
411	2016-06-06 10:00:00	27.075	14466.8	27.173	11022.3	27.173	7577.8	26.781	14466.8	27.37	12400.1	26.683	11022.3	26.585	12400.1	26.488	11022.3
412	2016-06-06 11:00:00	27.173	10333.4	27.173	10333.4	27.37	13089	27.075	12400.1	27.37	8611.2	26.977	11022.3	26.879	12400.1	26.977	11022.3
413	2016-06-06 12:00:00	27.272	11711.2	27.37	9300.1	27.37	11711.2	27.272	11022.3	27.37	10677.8	27.272	14466.8	27.173	10333.4	27.272	8266.7
414	2016-06-06 13:00:00	27.468	11022.3	27.468	10677.8	27.468	15155.7	27.468	15155.7	27.37	9300.1	27.468	10333.4	27.37	11711.2	27.468	11022.3
415	2016-06-06 14:00:00	27.567	9644.5	27.567	11711.2	27.665	10333.4	27.567	13777.9	27.37	12400.1	27.665	8266.7	27.468	10677.8	27.567	11711.2
416	2016-06-06 15:00:00	27.665	7233.4	27.567	12400.1	27.764	9300.1	27.665	10677.8	27.37	11711.2	27.764	12400.1	27.567	11711.2	27.567	10333.4
417	2016-06-06 16:00:00	27.665	15844.5	27.665	14466.8	27.665	11711.2	27.665	11711.2	27.37	11711.2	27.764	10677.8	27.567	10333.4	27.665	12400.1
418	2016-06-06 17:00:00	27.665	12400.1	27.567	11711.2	27.665	6200	27.665	8611.2	27.37	9300.1	27.764	10333.4	27.567	10677.8	27.665	12400.1
419	2016-06-06 18:00:00	27.567	9644.5	27.468	11022.3	27.567	8611.2	27.567	10677.8	27.37	10677.8	27.764	12400.1	27.468	10677.8	27.567	13777.9
420	2016-06-06 19:00:00	27.468	0	27.075	0	27.468	0	27.468	0	27.37	0	27.665	0	27.37	0	27.468	0
421	2016-06-06 20:00:00	27.272	0	27.173	0	27.075	0	26.781	0	27.37	0	27.272	0	26.683	0	26.879	0
422	2016-06-06 21:00:00	27.272	0	27.173	0	27.075	0	26.781	0	27.37	0	26.781	0	26.488	0	26.585	0
423	2016-06-06 22:00:00	27.173	0	27.272	0	27.173	0	26.977	0	27.37	0	26.683	0	26.488	0	26.488	0
424	2016-06-06 23:00:00	27.272	0	27.173	0	27.173	0	26.781	0	27.37	0	26.781	0	26.39	0	26.683	0
425	2016-06-07	27.173	0	27.075	0	27.173	0	26.879	0	27.37	0	26.781	0	26.488	0	26.585	0
426	2016-06-07 01:00:00	27.272	0	27.075	0	27.075	0	26.977	0	27.37	0	26.781	0	26.488	0	26.585	0
427	2016-06-07 02:00:00	27.272	0	27.272	0	27.173	0	26.781	0	27.37	0	26.879	0	26.488	0	26.683	0
428	2016-06-07 03:00:00	27.173	0	27.272	0	27.173	0	26.977	0	27.37	0	26.781	0	26.39	0	26.683	0
429	2016-06-07 04:00:00	27.173	0	27.173	0	27.173	0	26.977	0	27.37	0	26.781	0	26.488	0	26.585	0
430	2016-06-07 05:00:00	27.173	0	27.075	0	27.173	0	26.977	0	27.468	0	26.781	0	26.488	0	26.488	0
431	2016-06-07 06:00:00	27.173	0	27.173	0	27.173	0	26.977	0	27.37	0	26.781	0	26.585	0	26.585	0
432	2016-06-07 07:00:00	27.37	3100	27.272	2669.5	27.272	3272.2	26.781	4650	27.468	11711.2	26.879	4133.4	26.585	3788.9	26.585	3616.7
433	2016-06-07 08:00:00	27.37	2927.8	27.272	2669.5	27.272	3272.2	26.977	4994.5	27.468	12400.1	26.879	4305.6	26.683	2755.6	26.781	3788.9
434	2016-06-07 09:00:00	27.272	3444.5	27.272	2669.5	27.272	4133.4	26.977	2152.8	27.468	11022.3	26.977	3788.9	26.781	4133.4	26.879	2669.5
435	2016-06-07 10:00:00	27.37	2755.6	27.272	1980.6	27.272	3100	26.977	3788.9	27.468	4133.4	27.075	3444.5	26.879	3272.2	26.977	2669.5
436	2016-06-07 11:00:00	27.272	3272.2	27.173	2669.5	27.173	3444.5	27.075	3961.1	27.468	10333.4	27.075	3272.2	26.977	5511.1	27.075	4133.4
437	2016-06-07 12:00:00	27.272	2755.6	27.272	2669.5	27.272	4650	27.272	3616.7	27.468	12400.1	27.272	3788.9	27.173	3616.7	27.272	3961.1
438	2016-06-07 13:00:00	27.37	2755.6	27.37	2583.4	27.37	2669.5	27.37	3616.7	27.37	10333.4	27.37	4305.6	27.272	3272.2	27.37	3961.1
439	2016-06-07 14:00:00	27.468	3616.7	27.37	2583.4	27.468	2927.8	27.468	5511.1	27.37	13777.9	27.468	3272.2	27.37	4133.4	27.468	2755.6
440	2016-06-07 15:00:00	27.468	2669.5	27.37	2583.4	27.468	4305.6	27.37	2669.5	27.37	13777.9	27.567	3788.9	27.272	4305.6	27.37	2927.8
441	2016-06-07 16:00:00	27.468	2583.4	27.37	2583.4	27.37	3272.2	27.37	3616.7	27.37	3788.9	27.468	2927.8	27.272	4133.4	27.37	3788.9
442	2016-06-07 17:00:00	27.468	4477.8	27.37	2583.4	27.468	3616.7	27.37	3100	27.37	3272.2	27.468	5166.7	27.272	5166.7	27.37	3272.2
443	2016-06-07 18:00:00	27.468	2755.6	27.37	2497.2	27.468	3961.1	27.37	6544.5	27.37	3272.2	27.468	2755.6	27.272	2669.5	27.37	4477.8
444	2016-06-07 19:00:00	27.468	0	27.173	0	27.37	0	27.37	0	27.37	0	27.468	0	27.272	0	27.37	0
445	2016-06-07 20:00:00	27.173	0	27.075	0	27.173	0	26.781	0	26.977	0	27.173	0	26.585	0	26.683	0
446	2016-06-07 21:00:00	27.173	0	27.272	0	27.173	0	26.879	0	26.977	0	26.879	0	26.585	0	26.683	0
447	2016-06-07 22:00:00	27.173	0	27.173	0	27.173	0	26.879	0	26.977	0	26.781	0	26.488	0	26.683	0
448	2016-06-07 23:00:00	27.173	0	27.272	0	27.272	0	26.781	0	26.977	0	26.879	0	26.585	0	26.585	0
449	2016-06-08	27.173	0	27.272	0	27.173	0	26.977	0	26.977	0	26.879	0	26.585	0	26.585	0
450	2016-06-08 01:00:00	27.173	0	27.173	0	27.173	0	26.879	0	26.977	0	26.879	0	26.488	0	26.585	0
451	2016-06-08 02:00:00	27.173	0	27.173	0	27.173	0	26.977	0	26.977	0	26.879	0	26.488	0	26.683	0
452	2016-06-08 03:00:00	27.173	0	27.173	0	27.173	0	26.879	0	26.977	0	26.879	0	26.488	0	26.683	0
453	2016-06-08 04:00:00	27.173	0	27.173	0	27.272	0	26.977	0	26.977	0	26.879	0	26.488	0	26.585	0
454	2016-06-08 05:00:00	27.173	0	27.173	0	27.272	0	26.781	0	26.977	0	26.879	0	26.488	0	26.585	0
455	2016-06-08 06:00:00	27.173	0	27.173	0	27.272	0	26.879	0	26.977	0	26.879	0	26.488	0	26.585	0
456	2016-06-08 07:00:00	27.272	4133.4	27.272	2669.5	27.173	2755.6	26.977	3272.2	26.977	2927.8	26.879	5511.1	26.585	2411.1	26.781	4305.6
457	2016-06-08 08:00:00	27.37	3788.9	27.173	2755.6	27.272	2497.2	26.977	2669.5	27.468	3100	27.075	2927.8	26.585	4477.8	26.683	3272.2
458	2016-06-08 09:00:00	27.37	3444.5	27.173	2669.5	27.272	3616.7	26.977	3272.2	27.468	2669.5	26.977	4822.3	26.683	3100	26.781	3616.7
459	2016-06-08 10:00:00	27.37	3616.7	27.173	2755.6	27.37	3100	26.977	3788.9	27.468	3272.2	26.977	3788.9	26.781	2927.8	26.879	5338.9
460	2016-06-08 11:00:00	27.37	4994.5	27.173	2669.5	27.272	4133.4	26.977	2927.8	27.468	3100	26.977	3100	26.879	2755.6	26.879	3961.1
461	2016-06-08 12:00:00	27.37	3961.1	27.272	2669.5	27.272	2669.5	27.075	3272.2	27.468	2755.6	27.075	2238.9	27.075	2927.8	26.977	3961.1
462	2016-06-08 13:00:00	27.37	6200	27.173	2669.5	27.173	3444.5	27.075	2755.6	27.468	3100	27.173	3616.7	27.075	4305.6	27.075	3961.1
463	2016-06-08 14:00:00	27.37	2927.8	27.173	2669.5	27.272	3616.7	27.173	3788.9	27.468	3444.5	27.272	2755.6	27.173	5166.7	27.075	3616.7
464	2016-06-08 15:00:00	27.272	4650	27.173	2583.4	27.173	4822.3	27.173	2927.8	27.468	2152.8	27.37	2669.5	27.173	3788.9	27.173	3788.9
465	2016-06-08 16:00:00	27.37	3272.2	27.272	2669.5	27.173	2755.6	27.173	2927.8	27.468	2927.8	27.37	3788.9	27.272	4822.3	27.173	5338.9
466	2016-06-08 17:00:00	27.272	3272.2	27.272	2583.4	27.272	3616.7	27.272	4650	27.468	3616.7	27.37	2927.8	27.272	3961.1	27.173	3444.5
467	2016-06-08 18:00:00	27.272	2927.8	27.272	2583.4	27.272	4305.6	27.272	4133.4	27.468	3272.2	27.37	2927.8	27.272	2927.8	27.173	3444.5
468	2016-06-08 19:00:00	27.37	0	27.075	0	27.272	0	27.272	0	27.468	0	27.37	0	27.272	0	27.173	0
469	2016-06-08 20:00:00	27.173	0	27.173	0	27.173	0	26.977	0	26.977	0	27.075	0	26.488	0	26.683	0
470	2016-06-08 21:00:00	27.272	0	27.272	0	27.272	0	26.781	0	26.977	0	26.879	0	26.488	0	26.683	0
471	2016-06-08 22:00:00	27.173	0	27.173	0	27.37	0	26.879	0	26.977	0	26.879	0	26.488	0	26.488	0
472	2016-06-08 23:00:00	27.173	0	27.272	0	27.37	0	26.879	0	26.977	0	26.879	0	26.488	0	26.585	0
473	2016-06-09	27.272	0	27.173	0	27.272	0	26.781	0	26.977	0	26.781	0	26.488	0	26.585	0
474	2016-06-09 01:00:00	27.272	0	27.272	0	27.272	0	26.879	0	26.977	0	26.781	0	26.488	0	26.683	0
475	2016-06-09 02:00:00	27.272	0	27.272	0	27.272	0	26.977	0	26.977	0	26.781	0	26.488	0	26.585	0
476	2016-06-09 03:00:00	27.272	0	27.173	0	27.37	0	26.879	0	26.977	0	26.781	0	26.488	0	26.585	0
477	2016-06-09 04:00:00	27.272	0	27.272	0	27.37	0	27.075	0	26.977	0	26.781	0	26.488	0	26.683	0
478	2016-06-09 05:00:00	27.272	0	27.272	0	27.272	0	26.879	0	26.977	0	26.781	0	26.488	0	26.683	0
479	2016-06-09 06:00:00	27.272	0	27.075	0	27.272	0	26.879	0	26.977	0	26.781	0	26.488	0	26.488	0
480	2016-06-09 07:00:00	27.272	4822.3	27.173	2669.5	27.272	1980.6	26.977	6200	26.977	3444.5	26.879	2755.6	26.488	2669.5	26.488	3272.2
481	2016-06-09 08:00:00	27.37	2755.6	27.272	2583.4	27.37	5511.1	26.977	4305.6	27.468	4477.8	26.977	3444.5	26.683	5166.7	26.683	2238.9
482	2016-06-09 09:00:00	27.272	3100	27.272	2497.2	27.37	5511.1	27.075	4650	27.468	2669.5	26.977	5166.7	26.781	5166.7	26.781	3272.2
483	2016-06-09 10:00:00	27.272	3616.7	27.173	2583.4	27.272	5511.1	26.879	2583.4	27.468	3616.7	26.977	3788.9	26.879	5338.9	26.781	3444.5
484	2016-06-09 11:00:00	27.37	3444.5	27.173	2497.2	27.272	5511.1	26.977	4477.8	27.468	3100	26.977	2755.6	26.977	4994.5	26.879	2927.8
485	2016-06-09 12:00:00	27.272	4650	27.173	2583.4	27.37	6200	27.075	2927.8	27.468	3444.5	27.075	2066.7	27.075	5166.7	27.075	3444.5
486	2016-06-09 13:00:00	27.37	2755.6	27.173	2411.1	27.272	6200	27.173	4994.5	27.468	2927.8	27.272	1808.3	27.173	4994.5	27.075	2927.8
487	2016-06-09 14:00:00	27.468	4994.5	27.272	2583.4	27.272	6200	27.075	3444.5	27.468	2411.1	27.272	1550	27.075	4994.5	27.075	3272.2
488	2016-06-09 15:00:00	27.468	3961.1	27.272	2583.4	27.37	6200	27.173	3444.5	27.468	4822.3	27.075	1216.3	27.075	4994.5	27.075	3616.7
489	2016-06-09 16:00:00	27.272	3616.7	27.272	2583.4	27.272	6200	27.173	3444.5	27.468	3100	27.075	850.4	27.173	5166.7	27.075	3788.9
490	2016-06-09 17:00:00	27.37	3100	27.173	2583.4	27.272	5511.1	27.173	3444.5	27.468	2755.6	27.173	2927.8	27.173	4994.5	27.075	2669.5
491	2016-06-09 18:00:00	27.272	3272.2	27.272	2497.2	27.37	5511.1	27.173	3272.2	27.37	3272.2	27.173	3272.2	27.173	5166.7	27.173	4994.5
492	2016-06-09 19:00:00	27.272	0	27.173	0	27.37	0	27.173	0	27.272	0	27.173	0	27.173	0	27.075	0
493	2016-06-09 20:00:00	27.173	0	27.272	0	27.272	0	27.075	0	27.272	0	26.879	0	26.488	0	26.683	0
494	2016-06-09 21:00:00	27.173	0	27.173	0	27.173	0	26.977	0	27.173	0	26.781	0	26.585	0	26.683	0
495	2016-06-09 22:00:00	27.272	0	27.272	0	27.37	0	26.781	0	27.173	0	26.879	0	26.683	0	26.585	0
496	2016-06-09 23:00:00	27.272	0	27.272	0	27.37	0	26.879	0	27.173	0	26.879	0	26.585	0	26.683	0
497	2016-06-10	27.272	0	27.272	0	27.272	0	26.977	0	27.272	0	26.879	0	26.488	0	26.585	0
498	2016-06-10 01:00:00	27.173	0	27.173	0	27.37	0	27.075	0	27.272	0	26.879	0	26.585	0	26.683	0
499	2016-06-10 02:00:00	27.173	0	27.272	0	27.37	0	26.977	0	27.37	0	26.977	0	26.585	0	26.683	0
500	2016-06-10 03:00:00	27.173	0	27.37	0	27.37	0	27.075	0	27.37	0	26.879	0	26.585	0	26.683	0
501	2016-06-10 04:00:00	27.173	0	27.272	0	27.272	0	27.075	0	27.37	0	26.879	0	26.585	0	26.585	0
502	2016-06-10 05:00:00	27.173	0	27.272	0	27.468	0	27.075	0	27.37	0	26.977	0	26.585	0	26.683	0
503	2016-06-10 06:00:00	27.272	0	27.272	0	27.272	0	26.879	0	27.37	0	26.977	0	26.585	0	26.683	0
504	2016-06-10 07:00:00	27.272	2755.6	27.272	2583.4	27.37	2583.4	26.879	6200	27.37	8266.7	26.879	12400.1	26.585	3272.2	26.683	2583.4
505	2016-06-10 08:00:00	27.37	2583.4	27.272	2583.4	27.468	5511.1	26.977	3100	27.37	10677.8	26.977	3788.9	26.781	5166.7	26.781	3616.7
506	2016-06-10 09:00:00	27.37	2325	27.272	2583.4	27.468	5511.1	27.075	2927.8	27.37	9644.5	26.977	3788.9	26.683	5338.9	26.683	2411.1
507	2016-06-10 10:00:00	27.37	12400.1	27.173	2497.2	27.37	12400.1	27.075	5511.1	27.37	9644.5	27.075	3961.1	26.879	5166.7	26.781	4305.6
508	2016-06-10 11:00:00	27.272	12400.1	27.468	10677.8	27.272	4650	27.173	5166.7	27.37	14466.8	27.075	3961.1	27.173	1377.8	27.075	3100
509	2016-06-10 12:00:00	27.665	12400.1	27.862	3444.5	27.665	3788.9	27.567	4133.4	27.37	10677.8	27.272	3788.9	27.567	3961.1	27.567	3616.7
510	2016-06-10 13:00:00	28.159	12400.1	28.555	3788.9	28.159	2497.2	28.06	4477.8	27.37	9644.5	27.764	990.3	28.159	3961.1	28.159	3616.7
511	2016-06-10 14:00:00	28.655	12400.1	28.754	1463.9	28.655	4650	28.655	3788.9	27.37	8611.2	28.754	7233.4	28.655	3444.5	28.754	3616.7
512	2016-06-10 15:00:00	28.159	0	27.961	0	28.258	0	28.258	0	27.37	0	28.853	0	28.159	0	28.357	0
513	2016-06-10 16:00:00	27.665	13777.9	27.567	1808.3	27.961	12400.1	27.764	322.9	27.37	13089	28.159	7233.4	27.468	3616.7	27.665	5511.1
514	2016-06-10 17:00:00	27.272	13777.9	27.37	1808.3	27.567	12400.1	27.075	8266.7	27.37	9644.5	27.37	8266.7	26.683	376.7	26.781	3961.1
515	2016-06-10 18:00:00	27.468	13089	27.37	1722.2	27.567	11711.2	27.075	8266.7	27.37	11022.3	26.879	8266.7	26.683	398.3	26.585	3444.5
516	2016-06-10 19:00:00	27.567	0	27.37	0	27.567	0	27.075	0	27.37	0	26.879	0	26.683	0	26.585	0
517	2016-06-10 20:00:00	27.468	0	27.37	0	27.567	0	27.075	0	27.37	0	26.879	0	26.683	0	26.585	0
518	2016-06-10 21:00:00	27.272	0	27.173	0	27.272	0	26.781	0	27.37	0	26.781	0	26.488	0	26.585	0
519	2016-06-10 22:00:00	27.272	0	27.272	0	27.272	0	26.781	0	27.37	0	26.39	0	26.683	0	26.585	0
520	2016-06-10 23:00:00	27.37	0	27.272	0	27.272	0	26.879	0	27.37	0	26.097	0	26.488	0	26.683	0
521	2016-06-11	27.272	0	27.272	0	27.272	0	26.879	0	27.37	0	26.097	0	26.683	0	26.585	0
522	2016-06-11 01:00:00	27.173	0	27.173	0	27.173	0	26.879	0	27.37	0	26	0	26.585	0	26.585	0
523	2016-06-11 02:00:00	27.272	0	27.173	0	27.272	0	26.879	0	27.468	0	26	0	26.585	0	26.585	0
524	2016-06-11 03:00:00	27.173	0	27.272	0	27.173	0	26.879	0	27.37	0	26	0	26.683	0	26.683	0
525	2016-06-11 04:00:00	27.272	0	27.272	0	27.272	0	26.781	0	27.37	0	26.097	0	26.683	0	26.585	0
526	2016-06-11 05:00:00	27.272	0	27.173	0	27.173	0	26.879	0	27.37	0	26.195	0	26.683	0	26.585	0
527	2016-06-11 06:00:00	27.272	0	27.272	0	27.173	0	26.879	0	27.37	0	26.097	0	26.585	0	26.585	0
528	2016-06-11 07:00:00	27.272	13089	27.272	1808.3	27.567	12400.1	27.075	8266.7	27.37	10677.8	26.097	3788.9	26.585	3788.9	26.585	3444.5
529	2016-06-11 08:00:00	27.272	13777.9	27.272	1894.5	27.468	12400.1	27.173	8266.7	27.37	10677.8	26.585	8611.2	26.683	8611.2	26.585	2755.6
530	2016-06-11 09:00:00	27.468	13777.9	27.37	1808.3	27.567	12400.1	27.075	8266.7	27.37	12400.1	26.781	8611.2	26.683	8611.2	26.683	3616.7
531	2016-06-11 10:00:00	27.567	13089	27.272	1722.2	27.567	12400.1	27.173	8266.7	27.37	8611.2	26.879	8266.7	26.585	8266.7	26.683	3272.2
532	2016-06-11 11:00:00	27.468	13089	27.37	1722.2	27.468	12400.1	27.075	8266.7	27.37	13089	26.879	8611.2	26.585	8611.2	26.683	3788.9
533	2016-06-11 12:00:00	27.468	13777.9	27.37	1808.3	27.567	12400.1	27.075	8266.7	27.37	12400.1	26.879	8611.2	26.585	8611.2	26.683	3616.7
534	2016-06-11 13:00:00	27.468	13089	27.272	1722.2	27.567	12400.1	27.075	8266.7	27.37	16533.4	26.879	8611.2	26.585	8611.2	26.683	3616.7
535	2016-06-11 14:00:00	27.468	13777.9	27.272	1808.3	27.468	12400.1	27.075	8266.7	27.37	11711.2	26.879	8611.2	26.683	8611.2	26.585	3616.7
536	2016-06-11 15:00:00	27.468	13089	27.37	1808.3	27.567	12400.1	27.075	8611.2	27.37	14466.8	26.879	8611.2	26.585	8611.2	26.585	3788.9
537	2016-06-11 16:00:00	27.468	13089	27.37	1808.3	27.468	12400.1	27.075	8266.7	27.37	14466.8	26.879	8611.2	26.781	8611.2	26.585	3961.1
538	2016-06-11 17:00:00	27.567	13089	27.37	1722.2	27.468	12400.1	27.075	8266.7	27.37	9644.5	26.781	8266.7	26.585	8266.7	26.585	5166.7
539	2016-06-11 18:00:00	27.468	13089	27.37	1722.2	27.468	12400.1	27.075	7577.8	27.37	11711.2	26.781	8266.7	26.585	8266.7	26.585	3272.2
540	2016-06-11 19:00:00	27.468	0	27.37	0	27.468	0	27.075	0	27.37	0	26.781	0	26.585	0	26.585	0
541	2016-06-11 20:00:00	27.567	0	27.37	0	27.468	0	27.075	0	27.37	0	26.781	0	26.585	0	26.585	0
542	2016-06-11 21:00:00	27.173	0	27.173	0	27.173	0	26.781	0	27.37	0	26.879	0	26.585	0	26.585	0
543	2016-06-11 22:00:00	27.272	0	27.272	0	27.173	0	26.781	0	27.37	0	26.39	0	26.488	0	26.585	0
544	2016-06-11 23:00:00	27.272	0	27.272	0	27.272	0	26.879	0	27.37	0	26.097	0	26.585	0	26.585	0
545	2016-06-12	27.272	0	27.272	0	27.173	0	26.879	0	27.37	0	26.097	0	26.585	0	26.585	0
546	2016-06-12 01:00:00	27.173	0	27.173	0	27.272	0	26.879	0	27.37	0	26.195	0	26.585	0	26.585	0
547	2016-06-12 02:00:00	27.272	0	27.272	0	27.272	0	26.879	0	27.37	0	26.097	0	26.488	0	26.585	0
548	2016-06-12 03:00:00	27.272	0	27.272	0	27.173	0	26.781	0	27.37	0	26.097	0	26.585	0	26.488	0
549	2016-06-12 04:00:00	27.173	0	27.173	0	27.272	0	26.879	0	27.37	0	26.195	0	26.585	0	26.488	0
550	2016-06-12 05:00:00	27.272	0	27.272	0	27.272	0	26.781	0	27.37	0	26.097	0	26.488	0	26.488	0
551	2016-06-12 06:00:00	27.173	0	27.272	0	27.173	0	26.879	0	27.468	0	26.097	0	26.488	0	26.585	0
552	2016-06-12 07:00:00	27.272	13777.9	27.37	1808.3	27.567	12400.1	27.075	8266.7	27.468	7233.4	26.097	8124.2	26.683	8124.2	26.585	3961.1
553	2016-06-12 08:00:00	27.173	13089	27.37	1722.2	27.468	12400.1	27.075	8266.7	27.37	15844.5	26.585	8266.7	26.585	8266.7	26.585	5511.1
554	2016-06-12 09:00:00	27.567	13089	27.272	5166.7	27.468	12400.1	27.075	8266.7	27.468	12400.1	26.781	7577.8	26.781	7577.8	26.781	2755.6
555	2016-06-12 10:00:00	27.37	13777.9	27.37	5338.9	27.567	12400.1	27.075	8266.7	27.468	9644.5	26.977	8611.2	26.879	8611.2	26.879	2066.7
556	2016-06-12 11:00:00	27.468	13089	27.37	5338.9	27.468	11711.2	27.075	8266.7	27.37	11022.3	27.075	8611.2	26.781	8611.2	26.781	4305.6
557	2016-06-12 12:00:00	27.468	13089	27.272	5338.9	27.468	11711.2	27.075	8266.7	27.468	11022.3	26.977	8611.2	26.683	8611.2	26.781	2583.4
558	2016-06-12 13:00:00	27.567	13089	27.37	5338.9	27.468	12400.1	26.977	8266.7	27.468	10333.4	26.977	8266.7	26.781	8266.7	26.781	4133.4
559	2016-06-12 14:00:00	27.468	13089	27.272	5338.9	27.468	12400.1	27.075	8266.7	27.468	9300.1	26.977	8266.7	26.781	8266.7	26.781	3616.7
560	2016-06-12 15:00:00	27.468	13089	27.272	5338.9	27.468	12400.1	27.075	8266.7	27.468	10677.8	26.977	8266.7	26.683	8266.7	26.683	3961.1
561	2016-06-12 16:00:00	27.468	13777.9	27.272	5338.9	27.468	12400.1	27.075	8266.7	27.468	11711.2	26.977	8266.7	26.781	8266.7	26.781	3616.7
562	2016-06-12 17:00:00	27.468	12400.1	27.37	5166.7	27.567	12400.1	27.075	8266.7	27.37	12400.1	26.977	8266.7	26.683	8266.7	26.683	3444.5
563	2016-06-12 18:00:00	27.468	13089	27.37	4822.3	27.468	12400.1	27.075	7577.8	27.37	14466.8	26.879	8266.7	26.683	8266.7	26.781	3100
564	2016-06-12 19:00:00	27.468	0	27.272	0	27.272	0	26.781	0	27.37	0	26.977	0	26.585	0	26.585	0
565	2016-06-12 20:00:00	27.468	0	27.173	0	27.173	0	26.879	0	27.468	0	26.488	0	26.683	0	26.585	0
566	2016-06-12 21:00:00	27.272	0	27.272	0	27.173	0	26.879	0	27.468	0	26.195	0	26.585	0	26.585	0
567	2016-06-12 22:00:00	27.173	0	27.173	0	27.173	0	26.781	0	27.468	0	26.097	0	26.683	0	26.585	0
568	2016-06-12 23:00:00	27.272	0	27.173	0	27.272	0	26.879	0	27.468	0	26.097	0	26.683	0	26.585	0
569	2016-06-13	27.173	0	27.272	0	27.173	0	26.879	0	27.468	0	26.097	0	26.683	0	26.585	0
570	2016-06-13 01:00:00	27.272	0	27.272	0	27.272	0	26.879	0	27.37	0	26.097	0	26.683	0	26.585	0
571	2016-06-13 02:00:00	27.272	0	27.173	0	27.173	0	26.879	0	27.468	0	26.097	0	26.683	0	26.585	0
572	2016-06-13 03:00:00	27.173	0	27.173	0	27.173	0	26.879	0	27.37	0	26.097	0	26.488	0	26.585	0
573	2016-06-13 04:00:00	27.272	0	27.173	0	27.173	0	26.879	0	27.37	0	26.195	0	26.488	0	26.585	0
574	2016-06-13 05:00:00	27.173	0	27.173	0	27.173	0	26.781	0	27.468	0	26.097	0	26.488	0	26.585	0
575	2016-06-13 06:00:00	27.272	0	27.272	0	27.173	0	26.781	0	27.468	0	26.195	0	26.488	0	26.488	0
576	2016-06-13 07:00:00	27.173	13089	27.272	5338.9	27.468	12400.1	27.075	8266.7	27.37	6200	26.097	3788.9	26.683	3788.9	26.683	3272.2
577	2016-06-13 08:00:00	27.173	13089	27.272	4650	27.567	12400.1	27.075	8266.7	27.37	8611.2	26.585	8611.2	26.683	8611.2	26.585	2755.6
578	2016-06-13 09:00:00	27.37	12400.1	27.272	4650	27.468	12400.1	27.075	7577.8	27.37	11022.3	26.781	8266.7	26.683	8266.7	26.683	4133.4
579	2016-06-13 10:00:00	27.567	12400.1	27.37	5338.9	27.468	12400.1	26.977	8266.7	27.37	14466.8	26.977	8266.7	26.683	8266.7	26.781	2669.5
580	2016-06-13 11:00:00	27.37	13089	27.37	5338.9	27.468	11711.2	27.075	8266.7	27.468	10333.4	26.977	8266.7	26.683	8266.7	26.683	3100
581	2016-06-13 12:00:00	27.468	13089	27.272	4650	27.468	11711.2	27.075	7577.8	27.468	14466.8	26.879	8266.7	26.585	8266.7	26.683	2755.6
582	2016-06-13 13:00:00	27.468	12400.1	27.272	4650	27.468	12400.1	27.075	8266.7	27.468	12400.1	26.879	8266.7	26.585	8266.7	26.683	2927.8
583	2016-06-13 14:00:00	27.468	13089	27.272	5338.9	27.468	12400.1	27.075	8266.7	27.468	11022.3	26.879	7577.8	26.683	7577.8	26.683	2755.6
584	2016-06-13 15:00:00	27.567	13089	27.37	4650	27.468	12400.1	27.075	8266.7	27.468	15155.7	26.977	7577.8	26.781	7577.8	26.879	3444.5
585	2016-06-13 16:00:00	27.468	13089	27.272	5338.9	27.468	12400.1	27.075	8266.7	27.468	13777.9	27.075	7577.8	26.683	7577.8	26.781	2927.8
586	2016-06-13 17:00:00	27.468	12400.1	27.37	5338.9	27.468	11711.2	27.075	8266.7	27.468	10677.8	26.977	7577.8	26.683	7577.8	26.781	2755.6
587	2016-06-13 18:00:00	27.468	13089	27.272	5166.7	27.468	12400.1	26.977	8266.7	27.468	11711.2	26.977	8266.7	26.683	8266.7	26.781	5511.1
588	2016-06-13 19:00:00	27.468	0	27.173	0	27.173	0	26.781	0	27.468	0	26.977	0	26.488	0	26.585	0
589	2016-06-13 20:00:00	27.37	0	27.173	0	27.173	0	26.781	0	27.468	0	26.488	0	26.585	0	26.585	0
590	2016-06-13 21:00:00	27.173	0	27.272	0	27.173	0	26.879	0	27.468	0	26.292	0	26.585	0	26.585	0
591	2016-06-13 22:00:00	27.173	0	27.173	0	27.173	0	26.879	0	27.468	0	26.097	0	26.585	0	26.585	0
592	2016-06-13 23:00:00	27.173	0	27.272	0	27.173	0	26.781	0	27.468	0	26.097	0	26.585	0	26.488	0
593	2016-06-14	27.173	0	27.173	0	27.173	0	26.879	0	27.468	0	26.097	0	26.585	0	26.585	0
594	2016-06-14 01:00:00	27.272	0	27.173	0	27.173	0	26.781	0	27.468	0	26.097	0	26.585	0	26.488	0
595	2016-06-14 02:00:00	27.173	0	27.272	0	27.173	0	26.879	0	27.468	0	26.097	0	26.585	0	26.585	0
596	2016-06-14 03:00:00	27.173	0	27.173	0	27.173	0	26.781	0	27.468	0	26.097	0	26.585	0	26.488	0
597	2016-06-14 04:00:00	27.272	0	27.173	0	27.173	0	26.879	0	27.468	0	26.097	0	26.585	0	26.585	0
598	2016-06-14 05:00:00	27.173	0	27.272	0	27.173	0	26.781	0	27.468	0	26.097	0	26.585	0	26.585	0
599	2016-06-14 06:00:00	27.173	0	27.173	0	27.173	0	26.879	0	27.468	0	26.097	0	26.488	0	26.585	0
600	2016-06-14 07:00:00	27.173	13089	27.272	4650	27.468	11711.2	27.075	8266.7	27.468	12400.1	26.097	3788.9	26.683	3788.9	26.585	2755.6
601	2016-06-14 08:00:00	27.173	12400.1	27.272	4650	27.468	12400.1	27.075	8266.7	27.468	9300.1	26.585	8266.7	26.683	8266.7	26.683	2927.8
602	2016-06-14 09:00:00	27.468	13089	27.37	5166.7	27.272	2411.1	27.075	8266.7	27.468	10333.4	26.879	8266.7	26.683	8266.7	26.781	2927.8
603	2016-06-14 10:00:00	27.468	13089	27.272	5166.7	27.272	3444.5	27.075	8266.7	27.468	10333.4	26.977	8611.2	26.585	8611.2	26.683	2927.8
604	2016-06-14 11:00:00	27.37	13089	27.37	5166.7	27.272	3616.7	27.075	8266.7	27.468	12400.1	26.879	8611.2	26.683	8611.2	26.585	2927.8
605	2016-06-14 12:00:00	27.468	12400.1	27.468	5166.7	27.272	2755.6	27.075	8266.7	27.468	8611.2	26.879	8266.7	26.585	8266.7	26.683	2927.8
606	2016-06-14 13:00:00	27.468	13089	27.37	5166.7	27.272	4477.8	27.075	8266.7	27.468	10677.8	26.977	8266.7	26.683	8266.7	26.781	3444.5
607	2016-06-14 14:00:00	27.468	13089	27.272	4650	27.272	3616.7	27.075	8266.7	27.468	9300.1	26.977	8266.7	26.585	8266.7	26.781	3100
608	2016-06-14 15:00:00	27.468	12400.1	27.37	5166.7	27.272	3272.2	27.075	8266.7	27.37	12400.1	26.977	8266.7	26.781	8266.7	26.683	6200
609	2016-06-14 16:00:00	27.468	12400.1	27.272	5338.9	27.272	2927.8	27.075	8266.7	27.37	11711.2	26.879	8611.2	26.683	8611.2	26.683	5511.1
610	2016-06-14 17:00:00	27.468	12400.1	27.272	5166.7	27.272	3100	27.075	8266.7	27.37	11711.2	26.879	8266.7	26.781	8266.7	26.781	5511.1
611	2016-06-14 18:00:00	27.37	12400.1	27.37	5166.7	27.272	3100	27.075	8266.7	27.37	9300.1	26.977	8266.7	26.683	8266.7	26.781	5511.1
612	2016-06-14 19:00:00	27.37	0	27.173	0	27.173	0	26.781	0	27.37	0	26.977	0	26.488	0	26.585	0
613	2016-06-14 20:00:00	27.37	0	27.173	0	27.173	0	26.879	0	27.468	0	26.488	0	26.585	0	26.585	0
614	2016-06-14 21:00:00	27.173	0	27.173	0	27.173	0	26.781	0	27.468	0	26.292	0	26.585	0	26.585	0
615	2016-06-14 22:00:00	27.173	0	27.272	0	27.173	0	26.879	0	27.37	0	26.097	0	26.488	0	26.585	0
616	2016-06-14 23:00:00	27.173	0	27.173	0	27.173	0	26.781	0	27.37	0	26.097	0	26.683	0	26.585	0
617	2016-06-15	27.173	0	27.272	0	27.173	0	26.879	0	27.468	0	26.097	0	26.585	0	26.585	0
618	2016-06-15 01:00:00	27.173	0	27.173	0	27.173	0	26.879	0	27.468	0	26.097	0	26.585	0	26.585	0
619	2016-06-15 02:00:00	27.173	0	27.272	0	27.173	0	26.879	0	27.468	0	26.097	0	26.488	0	26.585	0
620	2016-06-15 03:00:00	27.173	0	27.173	0	27.173	0	26.879	0	27.468	0	26.097	0	26.683	0	26.585	0
621	2016-06-15 04:00:00	27.173	0	27.272	0	27.173	0	26.781	0	27.37	0	26.097	0	26.585	0	26.585	0
622	2016-06-15 05:00:00	27.173	0	27.173	0	27.173	0	26.879	0	27.37	0	26.097	0	26.585	0	26.585	0
623	2016-06-15 06:00:00	27.173	0	27.272	0	27.173	0	26.781	0	27.37	0	26.097	0	26.488	0	26.585	0
624	2016-06-15 07:00:00	27.272	13089	27.468	5166.7	27.272	2755.6	27.075	8266.7	27.468	14466.8	26.097	8266.7	26.781	8266.7	26.585	5511.1
625	2016-06-15 08:00:00	27.272	12400.1	27.37	5166.7	27.272	2669.5	27.075	8266.7	27.468	10677.8	26.585	8611.2	26.781	8611.2	26.781	6200
626	2016-06-15 09:00:00	27.468	13089	27.37	5166.7	27.272	3616.7	26.977	8266.7	27.468	9644.5	26.879	8266.7	26.977	8266.7	26.879	5511.1
627	2016-06-15 10:00:00	27.468	12400.1	27.37	5166.7	27.272	3616.7	27.075	7577.8	27.468	8611.2	27.075	8266.7	26.879	8266.7	26.879	5511.1
628	2016-06-15 11:00:00	27.468	12400.1	27.272	5166.7	27.272	2755.6	27.075	7577.8	27.37	10677.8	27.075	8266.7	26.879	8266.7	26.879	5511.1
629	2016-06-15 12:00:00	27.468	12400.1	27.468	5166.7	27.272	2927.8	27.075	8266.7	27.468	11022.3	27.075	8266.7	26.879	8266.7	26.879	5511.1
630	2016-06-15 13:00:00	27.468	12400.1	27.272	4650	27.272	3788.9	27.075	7577.8	27.468	9644.5	27.075	8266.7	26.781	8266.7	26.879	7577.8
631	2016-06-15 14:00:00	27.37	12400.1	27.468	5338.9	27.272	3444.5	26.977	7577.8	27.468	13089	27.075	8266.7	26.781	8266.7	26.879	7577.8
632	2016-06-15 15:00:00	27.468	12400.1	27.272	4650	27.272	5338.9	27.075	7577.8	27.468	8266.7	27.075	8266.7	26.683	8266.7	26.879	7577.8
633	2016-06-15 16:00:00	27.37	12400.1	27.468	4477.8	27.272	3616.7	27.075	7577.8	27.37	11022.3	27.075	8266.7	26.683	8266.7	26.879	7233.4
634	2016-06-15 17:00:00	27.468	12400.1	27.272	4650	27.272	2755.6	27.075	7577.8	27.37	12400.1	27.075	7577.8	26.683	7577.8	26.879	7577.8
635	2016-06-15 18:00:00	27.468	12400.1	27.272	5166.7	27.272	2755.6	27.075	8266.7	27.37	11711.2	26.879	8266.7	26.781	8266.7	26.781	5511.1
636	2016-06-15 19:00:00	27.468	0	27.272	0	27.173	0	26.781	0	27.37	0	27.173	0	26.585	0	26.683	0
637	2016-06-15 20:00:00	27.468	0	27.272	0	27.173	0	26.879	0	27.37	0	26.585	0	26.585	0	26.585	0
638	2016-06-15 21:00:00	27.173	0	27.173	0	27.173	0	26.879	0	27.37	0	26.292	0	26.585	0	26.585	0
639	2016-06-15 22:00:00	27.173	0	27.272	0	27.173	0	26.879	0	27.37	0	26.195	0	26.683	0	26.585	0
640	2016-06-15 23:00:00	27.272	0	27.272	0	27.173	0	26.879	0	27.37	0	26.097	0	26.488	0	26.585	0
641	2016-06-16	27.173	0	27.173	0	27.173	0	26.879	0	27.468	0	26.097	0	26.585	0	26.585	0
642	2016-06-16 01:00:00	27.173	0	27.173	0	27.173	0	26.879	0	27.37	0	26.195	0	26.488	0	26.585	0
643	2016-06-16 02:00:00	27.272	0	27.272	0	27.173	0	26.879	0	27.37	0	26.195	0	26.683	0	26.585	0
644	2016-06-16 03:00:00	27.272	0	27.272	0	27.173	0	26.879	0	27.37	0	26.097	0	26.585	0	26.585	0
645	2016-06-16 04:00:00	27.272	0	27.173	0	27.173	0	26.879	0	27.37	0	26.195	0	26.488	0	26.585	0
646	2016-06-16 05:00:00	27.272	0	27.272	0	27.173	0	26.781	0	27.37	0	26.195	0	26.488	0	26.585	0
647	2016-06-16 06:00:00	27.173	0	27.173	0	27.173	0	26.879	0	27.37	0	26.195	0	26.585	0	26.488	0
648	2016-06-16 07:00:00	27.272	12400.1	27.468	5338.9	27.272	2583.4	27.075	8266.7	27.37	10677.8	26.292	3616.7	26.683	3616.7	26.585	7233.4
649	2016-06-16 08:00:00	27.272	12400.1	27.37	5338.9	27.272	3444.5	27.075	8266.7	27.37	10677.8	26.683	8266.7	26.585	8266.7	26.683	7577.8
650	2016-06-16 09:00:00	27.37	12400.1	27.37	5166.7	27.272	4133.4	27.075	8266.7	27.37	8611.2	26.879	8611.2	26.683	8611.2	26.781	7577.8
651	2016-06-16 10:00:00	27.37	12400.1	27.272	4994.5	27.272	3616.7	27.075	8266.7	27.37	8611.2	26.977	8266.7	26.781	8266.7	26.879	7577.8
652	2016-06-16 11:00:00	27.468	12400.1	27.272	4994.5	27.272	3444.5	27.173	8266.7	27.37	10333.4	27.075	8266.7	26.781	8266.7	26.879	7577.8
653	2016-06-16 12:00:00	27.468	12400.1	27.37	5166.7	27.272	2927.8	27.075	7577.8	27.37	10677.8	27.075	8266.7	26.879	8266.7	26.977	7577.8
654	2016-06-16 13:00:00	27.468	12400.1	27.272	5338.9	27.37	2927.8	27.075	7577.8	27.37	11022.3	27.173	8266.7	26.879	8266.7	26.977	7577.8
655	2016-06-16 14:00:00	27.37	12400.1	27.37	4650	27.272	4822.3	27.173	8266.7	27.37	11711.2	27.173	8266.7	26.977	8266.7	27.075	7577.8
656	2016-06-16 15:00:00	27.468	12400.1	27.468	4650	27.272	3616.7	27.173	7577.8	27.37	16533.4	27.272	8266.7	27.075	8266.7	27.173	6544.5
657	2016-06-16 16:00:00	27.468	12400.1	27.37	5166.7	27.272	3961.1	27.272	7577.8	27.37	11022.3	27.37	8266.7	27.272	8266.7	27.173	6544.5
658	2016-06-16 17:00:00	27.37	12400.1	27.37	4822.3	27.272	5166.7	27.272	7577.8	27.37	9300.1	27.37	8266.7	27.272	8266.7	27.173	6544.5
659	2016-06-16 18:00:00	27.37	12400.1	27.37	4477.8	27.272	3788.9	27.075	7577.8	27.37	11022.3	27.37	8266.7	27.075	8266.7	27.075	6200
660	2016-06-16 19:00:00	27.37	0	27.272	0	27.173	0	26.879	0	27.37	0	27.173	0	26.488	0	26.683	0
661	2016-06-16 20:00:00	27.468	0	27.272	0	27.173	0	26.781	0	27.37	0	26.585	0	26.781	0	26.585	0
662	2016-06-16 21:00:00	27.272	0	27.272	0	27.173	0	26.879	0	27.37	0	26.292	0	26.683	0	26.585	0
663	2016-06-16 22:00:00	27.173	0	27.272	0	27.173	0	26.879	0	27.37	0	26.195	0	26.683	0	26.585	0
664	2016-06-16 23:00:00	27.272	0	27.272	0	27.173	0	26.879	0	27.37	0	26.097	0	26.585	0	26.683	0
665	2016-06-17	27.272	0	27.272	0	27.173	0	26.879	0	27.37	0	26.097	0	26.781	0	26.683	0
666	2016-06-17 01:00:00	27.272	0	27.272	0	27.173	0	26.781	0	27.37	0	26.097	0	26.683	0	26.585	0
667	2016-06-17 02:00:00	27.37	0	27.272	0	27.173	0	26.977	0	27.37	0	26.097	0	26.585	0	26.585	0
668	2016-06-17 03:00:00	27.272	0	27.173	0	27.173	0	26.879	0	27.37	0	26.097	0	26.781	0	26.585	0
669	2016-06-17 04:00:00	27.272	0	27.272	0	27.173	0	26.879	0	27.37	0	26.097	0	26.585	0	26.585	0
670	2016-06-17 05:00:00	27.272	0	27.272	0	27.173	0	26.879	0	27.37	0	26.097	0	26.781	0	26.585	0
671	2016-06-17 06:00:00	27.173	0	27.272	0	27.173	0	26.879	0	27.37	0	26.097	0	26.781	0	26.585	0
672	2016-06-17 07:00:00	27.272	13089	26.977	5338.9	27.272	3616.7	27.075	7233.4	27.37	10333.4	26.097	3788.9	26.977	3788.9	26.585	7233.4
673	2016-06-17 08:00:00	27.37	13089	30.558	2583.4	27.37	3444.5	27.173	5511.1	27.37	11022.3	26.683	8611.2	27.075	8611.2	27.075	7233.4
674	2016-06-17 09:00:00	27.567	12400.1	28.456	3961.1	27.567	4305.6	27.665	4822.3	27.37	12400.1	27.37	8266.7	27.567	8266.7	27.567	3788.9
675	2016-06-17 10:00:00	27.468	6544.5	28.555	3788.9	28.06	3961.1	28.06	3272.2	27.272	3616.7	27.862	7577.8	28.159	7577.8	27.961	3961.1
676	2016-06-17 11:00:00	27.764	12400.1	28.853	3788.9	28.655	9300.1	28.555	2066.7	27.173	2583.4	28.357	7577.8	28.655	7577.8	28.357	3616.7
677	2016-06-17 12:00:00	28.06	12400.1	29.152	3788.9	29.053	12400.1	28.953	2927.8	27.173	3616.7	28.853	8266.7	28.853	8266.7	28.754	5166.7
678	2016-06-17 13:00:00	28.655	0	28.754	0	29.053	0	28.953	0	27.075	0	29.152	0	28.953	0	28.953	0
679	2016-06-17 14:00:00	29.053	12400.1	28.456	8266.7	28.555	12400.1	28.456	5511.1	27.075	3616.7	28.853	7577.8	28.456	7577.8	28.357	7233.4
680	2016-06-17 15:00:00	28.853	13089	28.258	8611.2	28.357	12400.1	28.159	5166.7	27.075	6200	28.357	7577.8	28.258	7577.8	28.159	7577.8
681	2016-06-17 16:00:00	28.456	13089	28.06	8266.7	28.159	12400.1	28.06	5166.7	27.075	4305.6	28.258	7577.8	28.06	7577.8	28.06	7233.4
682	2016-06-17 17:00:00	28.258	1243.1	27.567	8864.6	27.862	1164.6	27.764	5118.4	27.075	5166.7	28.159	8266.7	27.764	8266.7	27.862	7139.9
683	2016-06-17 18:00:00	28.06	12400.1	27.37	5166.7	27.272	7577.8	27.075	8266.7	27.37	3961.1	26.977	9300.1	26.683	9300.1	26.781	5511.1
684	2016-06-17 19:00:00	27.665	0	27.272	0	27.173	0	26.977	0	26.977	0	27.173	0	26.879	0	26.977	0
685	2016-06-17 20:00:00	27.173	0	27.173	0	27.173	0	26.879	0	26.977	0	26.977	0	26.879	0	26.977	0
686	2016-06-17 21:00:00	27.075	0	27.173	0	27.075	0	26.879	0	26.977	0	26.977	0	26.879	0	26.879	0
687	2016-06-17 22:00:00	27.173	0	27.173	0	27.173	0	26.879	0	26.977	0	26.977	0	26.781	0	26.879	0
688	2016-06-17 23:00:00	27.075	0	27.173	0	27.173	0	26.879	0	26.977	0	26.879	0	26.781	0	26.879	0
689	2016-06-18	27.173	0	27.173	0	27.173	0	26.879	0	26.977	0	26.879	0	26.879	0	26.879	0
690	2016-06-18 01:00:00	27.272	0	27.173	0	27.075	0	26.879	0	26.977	0	26.977	0	26.879	0	26.879	0
691	2016-06-18 02:00:00	27.173	0	27.173	0	27.075	0	26.879	0	26.977	0	26.977	0	26.781	0	26.879	0
692	2016-06-18 03:00:00	27.075	0	27.173	0	27.173	0	26.879	0	26.977	0	26.977	0	26.781	0	26.879	0
693	2016-06-18 04:00:00	27.173	0	27.272	0	27.173	0	26.879	0	26.977	0	26.977	0	26.781	0	26.879	0
694	2016-06-18 05:00:00	27.075	0	27.567	0	27.37	0	26.977	0	26.977	0	26.879	0	27.075	0	26.977	0
695	2016-06-18 06:00:00	27.173	0	27.862	0	27.764	0	27.468	0	26.977	0	27.272	0	27.567	0	27.468	0
696	2016-06-18 07:00:00	27.567	12400.1	27.567	9300.1	27.37	12400.1	26.977	4305.6	26.977	4477.8	26.879	2755.6	27.075	2755.6	26.977	7577.8
697	2016-06-18 08:00:00	27.665	13089	27.862	8611.2	27.764	13089	26.977	4133.4	26.977	3100	27.272	7577.8	27.567	7577.8	27.468	8266.7
698	2016-06-18 09:00:00	27.961	13089	28.06	8611.2	27.961	12400.1	27.764	4133.4	27.075	3788.9	27.665	7577.8	27.862	7577.8	27.665	7233.4
699	2016-06-18 10:00:00	28.159	12400.1	28.258	8611.2	28.159	12400.1	27.961	4822.3	27.075	3961.1	27.961	7577.8	28.06	7577.8	27.961	7233.4
700	2016-06-18 11:00:00	28.258	12400.1	28.357	8611.2	28.357	12400.1	28.159	4477.8	27.075	3788.9	28.159	7577.8	28.258	7577.8	28.159	7233.4
701	2016-06-18 12:00:00	28.357	12400.1	28.456	8266.7	28.456	12400.1	28.258	4994.5	27.075	4305.6	28.258	7577.8	28.258	7577.8	28.258	7233.4
702	2016-06-18 13:00:00	28.555	12400.1	28.655	9300.1	28.655	12400.1	28.456	4650	27.075	4650	28.357	7577.8	28.555	7577.8	28.456	7233.4
703	2016-06-18 14:00:00	28.754	13089	28.853	8611.2	28.754	13089	28.555	4477.8	28.159	3444.5	28.555	7233.4	28.655	7233.4	28.555	7233.4
704	2016-06-18 15:00:00	28.853	13089	28.953	8611.2	28.953	13089	28.754	4994.5	28.258	3788.9	28.754	7577.8	28.754	7577.8	28.754	7233.4
705	2016-06-18 16:00:00	29.053	13089	29.152	8611.2	29.053	13089	28.853	4650	28.456	3444.5	28.853	7577.8	28.953	7577.8	28.853	7233.4
706	2016-06-18 17:00:00	29.152	12400.1	29.152	8266.7	29.152	12400.1	28.953	4133.4	28.555	3100	29.053	7233.4	29.053	7233.4	28.953	3788.9
707	2016-06-18 18:00:00	29.152	12400.1	29.252	8266.7	29.152	13089	28.953	4305.6	28.754	2927.8	29.053	7233.4	29.053	7233.4	28.953	3271.8
708	2016-06-18 19:00:00	28.953	0	27.862	0	27.961	0	27.862	0	28.853	0	28.258	0	27.862	0	27.961	0
709	2016-06-18 20:00:00	28.258	0	27.567	0	27.567	0	27.567	0	28.953	0	27.862	0	27.468	0	27.567	0
710	2016-06-18 21:00:00	27.764	0	27.272	0	27.37	0	27.272	0	28.953	0	27.567	0	27.272	0	27.37	0
711	2016-06-18 22:00:00	27.468	0	27.173	0	27.173	0	27.173	0	27.862	0	27.272	0	27.075	0	27.173	0
712	2016-06-18 23:00:00	27.173	0	27.075	0	27.173	0	26.977	0	27.567	0	27.075	0	26.977	0	27.075	0
713	2016-06-19	27.173	0	27.173	0	27.173	0	26.879	0	27.272	0	26.977	0	26.879	0	26.977	0
714	2016-06-19 01:00:00	27.272	0	27.173	0	27.075	0	26.879	0	27.173	0	26.977	0	26.781	0	26.879	0
715	2016-06-19 02:00:00	27.173	0	27.173	0	27.075	0	26.879	0	26.977	0	26.977	0	26.781	0	26.879	0
716	2016-06-19 03:00:00	27.075	0	27.075	0	27.075	0	26.879	0	26.879	0	26.977	0	26.781	0	26.879	0
717	2016-06-19 04:00:00	27.173	0	27.173	0	27.173	0	26.879	0	26.879	0	26.879	0	26.781	0	26.879	0
718	2016-06-19 05:00:00	27.075	0	27.567	0	27.37	0	26.977	0	27.862	0	26.879	0	27.075	0	26.977	0
719	2016-06-19 06:00:00	27.173	0	27.862	0	27.764	0	27.468	0	28.06	0	27.272	0	27.567	0	27.468	0
720	2016-06-19 07:00:00	27.37	12400.1	27.567	7577.8	27.37	12400.1	26.977	4477.8	27.862	5511.1	26.879	13089	27.075	13089	26.977	7233.4
721	2016-06-19 08:00:00	27.665	13089	27.862	8266.7	27.764	12400.1	27.468	4305.6	28.06	3444.5	27.272	7233.4	27.567	7233.4	27.468	7233.4
722	2016-06-19 09:00:00	27.862	13089	28.06	8266.7	27.961	12400.1	27.764	4305.6	28.357	3616.7	27.665	7577.8	27.862	7577.8	27.764	7233.4
723	2016-06-19 10:00:00	28.159	12400.1	28.258	8266.7	28.258	12400.1	27.961	4650	28.456	3100	27.961	7577.8	28.06	7577.8	27.961	7233.4
724	2016-06-19 11:00:00	28.357	12400.1	28.456	8266.7	28.456	12400.1	28.258	4305.6	28.655	3616.7	28.159	7577.8	28.357	7577.8	28.258	7233.4
725	2016-06-19 12:00:00	28.555	12400.1	28.655	8266.7	28.655	12400.1	28.357	4650	28.754	4305.6	28.456	7233.4	28.456	7233.4	28.456	6544.5
726	2016-06-19 13:00:00	28.754	12400.1	28.853	8266.7	28.853	12400.1	28.555	4822.3	28.853	3444.5	28.555	7233.4	28.655	7233.4	28.555	7233.4
727	2016-06-19 14:00:00	28.754	12400.1	28.853	8611.2	28.853	12400.1	28.655	4477.8	28.953	3616.7	28.754	7233.4	28.754	7233.4	28.655	7233.4
728	2016-06-19 15:00:00	28.953	13089	29.053	8266.7	29.053	12400.1	28.754	4305.6	29.053	2755.6	28.853	7233.4	28.853	7233.4	28.853	7233.4
729	2016-06-19 16:00:00	28.953	12400.1	29.053	8266.7	29.053	12400.1	28.853	4477.8	28.953	3616.7	28.953	7233.4	28.953	7233.4	28.853	6544.5
730	2016-06-19 17:00:00	29.053	12400.1	29.053	8266.7	29.152	12400.1	28.853	4133.4	28.754	5338.9	28.953	7233.4	29.053	7233.4	28.953	2669.5
731	2016-06-19 18:00:00	29.053	12400.1	29.152	8266.7	29.152	12400.1	28.853	4133.4	28.258	3100	29.053	7233.4	28.953	7233.4	28.953	2325
732	2016-06-19 19:00:00	28.754	0	27.862	0	27.862	0	27.862	0	27.272	0	28.159	0	27.862	0	27.961	0
733	2016-06-19 20:00:00	28.159	0	27.567	0	27.567	0	27.567	0	27.173	0	27.862	0	27.567	0	27.665	0
734	2016-06-19 21:00:00	27.764	0	27.37	0	27.37	0	27.37	0	26.977	0	27.567	0	27.272	0	27.37	0
735	2016-06-19 22:00:00	27.468	0	27.272	0	27.272	0	27.173	0	26.977	0	27.37	0	27.173	0	27.272	0
736	2016-06-19 23:00:00	27.272	0	27.173	0	27.075	0	27.075	0	27.764	0	27.173	0	26.977	0	27.173	0
737	2016-06-20	27.075	0	27.173	0	27.075	0	26.977	0	27.468	0	27.075	0	26.977	0	27.075	0
738	2016-06-20 01:00:00	27.173	0	27.173	0	27.075	0	26.977	0	27.272	0	27.075	0	26.879	0	26.977	0
739	2016-06-20 02:00:00	27.075	0	27.173	0	27.075	0	26.977	0	27.075	0	26.977	0	26.879	0	26.977	0
740	2016-06-20 03:00:00	27.075	0	27.173	0	27.173	0	26.977	0	27.075	0	26.977	0	26.879	0	26.977	0
741	2016-06-20 04:00:00	27.075	0	27.173	0	27.173	0	26.977	0	27.567	0	26.977	0	26.879	0	26.977	0
742	2016-06-20 05:00:00	27.075	0	27.567	0	27.37	0	27.075	0	27.862	0	26.977	0	27.173	0	27.075	0
743	2016-06-20 06:00:00	27.075	0	27.961	0	27.764	0	27.567	0	27.961	0	27.37	0	27.665	0	27.567	0
744	2016-06-20 07:00:00	27.37	12400.1	27.567	8266.7	27.37	12400.1	27.075	3961.1	27.961	2927.8	26.977	2583.4	27.173	12400.1	27.075	6544.5
745	2016-06-20 08:00:00	27.764	12400.1	27.961	8266.7	27.764	13089	27.567	4822.3	28.555	2497.2	27.37	7233.4	27.665	13089	27.567	6544.5
746	2016-06-20 09:00:00	28.06	12400.1	28.258	8266.7	28.159	13089	27.961	4650	29.152	2755.6	27.764	7233.4	27.961	13089	27.862	7233.4
747	2016-06-20 10:00:00	27.862	0	27.961	0	27.961	0	27.961	0	29.352	2583.4	28.159	0	27.862	0	27.961	0
748	2016-06-20 11:00:00	28.159	12400.1	28.456	7233.4	28.258	13089	28.06	7577.8	29.252	2325	27.862	2927.8	28.06	2152.8	27.961	4300.1
749	2016-06-20 12:00:00	28.754	12400.1	29.053	6200	28.853	12400.1	28.555	3788.9	29.152	2325	28.258	7577.8	28.655	13089	28.555	6544.5
750	2016-06-20 13:00:00	29.252	12400.1	29.552	6544.5	29.352	12400.1	29.152	3444.5	29.352	5166.7	28.853	7577.8	29.252	13089	29.152	6544.5
751	2016-06-20 14:00:00	29.352	4822.3	29.452	8266.7	29.452	10333.4	29.352	3272.2	29.152	2927.8	29.452	7577.8	29.352	183	29.352	6544.5
752	2016-06-20 15:00:00	29.152	4822.3	29.252	7233.4	29.352	10333.4	29.152	3100	29.252	2411.1	29.452	7233.4	29.152	183	29.252	6544.5
753	2016-06-20 16:00:00	29.152	4650	29.352	7233.4	29.352	10333.4	29.152	3272.2	29.252	2238.9	29.352	7233.4	29.152	183	29.152	7233.4
754	2016-06-20 17:00:00	29.252	4650	29.452	6544.5	29.452	9644.5	29.352	3100	29.152	2583.4	29.352	7233.4	29.252	172.2	29.352	6544.5
755	2016-06-20 18:00:00	29.152	3444.5	29.252	7577.8	29.352	9644.5	29.152	3100	28.853	2497.2	29.452	7233.4	29.252	193.8	29.252	6544.5
756	2016-06-20 19:00:00	29.053	3444.5	29.252	8266.7	29.252	9644.5	29.053	3100	29.452	0	29.352	6544.5	29.152	172.2	29.053	6544.5
757	2016-06-20 20:00:00	28.754	21.5	28.655	53.8	28.953	21.5	28.853	129.2	29.452	0	29.252	6544.5	28.853	0	28.853	150.7
		27.4782		27.5284		27.5171		27.2961		27.3985		27.356		27.1879		27.1698
		0.481641		0.528638		0.509781		0.602634		0.367109		0.759214		0.79292		0.687208
