# Supplementary material for: Responses of branching reef corals Acropora digitifera and Montipora digitata to elevated temperature and pCO2
Source: PeerJ. 2020 Dec 21;8:e10562. doi: 10.7717/peerj.10562 (PMC7759137; doi:10.7717/peerj.10562)
Supplement: Supplemental Information 6 [file peerj-08-10562-s006.xlsx]

## Sheet: Tempt Zoox Ad
Species	Temperature	Endosymbiont density
A. digitifera	30 C	2.35527
A. digitifera	30 C	1.75947
A. digitifera	30 C	2.08385
A. digitifera	30 C	2.13392
A. digitifera	30 C	1.3292
A. digitifera	32 C	0.830946
A. digitifera	32 C	0.340804
A. digitifera	32 C	0.140849
A. digitifera	32 C	0.291019
A. digitifera	32 C	0.61819
M. digitata	30 C	2.33112
M. digitata	30 C	2.02602
M. digitata	30 C	2.42882
M. digitata	30 C	1.37566
M. digitata	30 C	1.60473
M. digitata	32 C	2.20678
M. digitata	32 C	1.64014
M. digitata	32 C	0.327573
M. digitata	32 C	1.10194
M. digitata	32 C	0.145644
