# Supplementary material for: Responses of branching reef corals Acropora digitifera and Montipora digitata to elevated temperature and pCO2
Source: PeerJ. 2020 Dec 21;8:e10562. doi: 10.7717/peerj.10562 (PMC7759137; doi:10.7717/peerj.10562)
Supplement: Supplemental Information 7 [file peerj-08-10562-s007.xlsx]

## Sheet: Sheet1
Species	pCO2 (utm)	Total Chl (µg/cell)
A.digitifera	400	3.88278
A.digitifera	400	3.08671
A.digitifera	400	2.01694
A.digitifera	400	3.07742
A.digitifera	400	2.45407
A.digitifera	400	3.52603
A.digitifera	400	3.21522
A.digitifera	400	3.7533
A.digitifera	400	2.35999
A.digitifera	600	2.75026
A.digitifera	600	3.35745
A.digitifera	600	3.51401
A.digitifera	600	3.33244
A.digitifera	600	3.42742
A.digitifera	600	2.69065
A.digitifera	600	2.62548
A.digitifera	600	3.07269
A.digitifera	600	2.60332
A.digitifera	800	2.00311
A.digitifera	800	4.50243
A.digitifera	800	3.17206
A.digitifera	800	3.46359
A.digitifera	800	2.77535
A.digitifera	800	2.46817
A.digitifera	800	2.19272
A.digitifera	800	2.54833
A.digitifera	800	2.72594
A.digitifera	1000	2.32333
A.digitifera	1000	2.95366
A.digitifera	1000	2.97134
A.digitifera	1000	3.45609
A.digitifera	1000	3.56488
A.digitifera	1000	3.62495
A.digitifera	1000	3.95859
A.digitifera	1000	3.29559
A.digitifera	1000	2.19103
M.digitata	400	3.64476
M.digitata	400	3.76064
M.digitata	400	6.10837
M.digitata	400	5.61903
M.digitata	400	7.32962
M.digitata	400	3.58986
M.digitata	400	5.40481
M.digitata	400	3.80899
M.digitata	400	5.2638
M.digitata	600	2.44123
M.digitata	600	7.15119
M.digitata	600	3.55659
M.digitata	600	2.39611
M.digitata	600	3.23197
M.digitata	600	2.51269
M.digitata	600	5.10049
M.digitata	600	3.52056
M.digitata	600	4.7879
M.digitata	800	3.10145
M.digitata	800	5.83956
M.digitata	800	7.25
M.digitata	800	5.32354
M.digitata	800	3.59593
M.digitata	800	2.65231
M.digitata	800	8.5367
M.digitata	800	5.64001
M.digitata	800	3.74004
M.digitata	1000	3.12218
M.digitata	1000	4.98252
M.digitata	1000	5.58397
M.digitata	1000	5.62368
M.digitata	1000	5.00869
M.digitata	1000	4.39669
M.digitata	1000	5.26886
M.digitata	1000	7.00524
M.digitata	1000	5.32991
