# Supplementary material for: Responses of branching reef corals Acropora digitifera and Montipora digitata to elevated temperature and pCO2
Source: PeerJ. 2020 Dec 21;8:e10562. doi: 10.7717/peerj.10562 (PMC7759137; doi:10.7717/peerj.10562)
Supplement: Supplemental Information 8 [file peerj-08-10562-s008.xlsx]

## Sheet: Tempt FvFm Ad
Species	Temperature	Fv/Fm
A. digitifera	28 C	0.656
A. digitifera	28 C	0.643
A. digitifera	28 C	0.676
A. digitifera	28 C	0.674
A. digitifera	28 C	0.722
A. digitifera	30 C	0.596
A. digitifera	30 C	0.715
A. digitifera	30 C	0.65
A. digitifera	30 C	0.672
A. digitifera	30 C	0.645
A. digitifera	32 C	0.41
A. digitifera	32 C	0.382
A. digitifera	32 C	0.445
A. digitifera	32 C	0.371
A. digitifera	32 C	0.59
M. digitata	28 C	0.5775
M. digitata	28 C	0.608
M. digitata	28 C	0.545
M. digitata	28 C	0.526
M. digitata	28 C	0.632
M. digitata	30 C	0.609
M. digitata	30 C	0.569
M. digitata	30 C	0.55
M. digitata	30 C	0.609
M. digitata	30 C	0.635
M. digitata	32 C	0.502
M. digitata	32 C	0.623
M. digitata	32 C	0.415
M. digitata	32 C	0.466
M. digitata	32 C	0.396
