# Supplementary material for: Responses of branching reef corals Acropora digitifera and Montipora digitata to elevated temperature and pCO2
Source: PeerJ. 2020 Dec 21;8:e10562. doi: 10.7717/peerj.10562 (PMC7759137; doi:10.7717/peerj.10562)
Supplement: Supplemental Information 9 [file peerj-08-10562-s009.xlsx]

## Sheet: pCO2 FvFm Ad
Species	Treatments	FvFm
A.digitifera	400 ppm	0.625667
A.digitifera	400 ppm	0.659833
A.digitifera	400 ppm	0.629
A.digitifera	400 ppm	0.6305
A.digitifera	400 ppm	0.637167
A.digitifera	400 ppm	0.651333
A.digitifera	400 ppm	0.642167
A.digitifera	400 ppm	0.663833
A.digitifera	400 ppm	0.619667
A.digitifera	400 ppm	0.631667
A.digitifera	400 ppm	0.636833
A.digitifera	400 ppm	0.645
A.digitifera	400 ppm	0.639
A.digitifera	400 ppm	0.651333
A.digitifera	400 ppm	0.638833
A.digitifera	400 ppm	0.645333
A.digitifera	400 ppm	0.6345
A.digitifera	400 ppm	0.655667
A.digitifera	400 ppm	0.632333
A.digitifera	400 ppm	0.662333
A.digitifera	400 ppm	0.645
A.digitifera	400 ppm	0.612
A.digitifera	400 ppm	0.650833
A.digitifera	400 ppm	0.638167
A.digitifera	600 ppm	0.651167
A.digitifera	600 ppm	0.672167
A.digitifera	600 ppm	0.6665
A.digitifera	600 ppm	0.660167
A.digitifera	600 ppm	0.643833
A.digitifera	600 ppm	0.629167
A.digitifera	600 ppm	0.674667
A.digitifera	600 ppm	0.646333
A.digitifera	600 ppm	0.6275
A.digitifera	600 ppm	0.640333
A.digitifera	600 ppm	0.667333
A.digitifera	600 ppm	0.634833
A.digitifera	600 ppm	0.6355
A.digitifera	600 ppm	0.649167
A.digitifera	600 ppm	0.655167
A.digitifera	600 ppm	0.667333
A.digitifera	600 ppm	0.652333
A.digitifera	600 ppm	0.547667
A.digitifera	600 ppm	0.639833
A.digitifera	600 ppm	0.665
A.digitifera	600 ppm	0.6405
A.digitifera	600 ppm	0.645167
A.digitifera	600 ppm	0.649667
A.digitifera	600 ppm	0.658833
A.digitifera	800 ppm	0.6275
A.digitifera	800 ppm	0.662833
A.digitifera	800 ppm	0.6685
A.digitifera	800 ppm	0.658167
A.digitifera	800 ppm	0.619333
A.digitifera	800 ppm	0.658167
A.digitifera	800 ppm	0.634833
A.digitifera	800 ppm	0.661333
A.digitifera	800 ppm	0.629
A.digitifera	800 ppm	0.665333
A.digitifera	800 ppm	0.657833
A.digitifera	800 ppm	0.6255
A.digitifera	800 ppm	0.629
A.digitifera	800 ppm	0.641
A.digitifera	800 ppm	0.6305
A.digitifera	800 ppm	0.623833
A.digitifera	800 ppm	0.651667
A.digitifera	800 ppm	0.6495
A.digitifera	800 ppm	0.65
A.digitifera	800 ppm	0.641333
A.digitifera	800 ppm	0.604667
A.digitifera	800 ppm	0.6355
A.digitifera	800 ppm	0.629
A.digitifera	800 ppm	0.654333
A.digitifera	1000 ppm	0.651667
A.digitifera	1000 ppm	0.645333
A.digitifera	1000 ppm	0.652667
A.digitifera	1000 ppm	0.632833
A.digitifera	1000 ppm	0.661
A.digitifera	1000 ppm	0.6415
A.digitifera	1000 ppm	0.637333
A.digitifera	1000 ppm	0.661833
A.digitifera	1000 ppm	0.631
A.digitifera	1000 ppm	0.6485
A.digitifera	1000 ppm	0.652
A.digitifera	1000 ppm	0.5945
A.digitifera	1000 ppm	0.640167
A.digitifera	1000 ppm	0.645333
A.digitifera	1000 ppm	0.624333
A.digitifera	1000 ppm	0.641667
A.digitifera	1000 ppm	0.654
A.digitifera	1000 ppm	0.652667
A.digitifera	1000 ppm	0.667833
A.digitifera	1000 ppm	0.661333
A.digitifera	1000 ppm	0.679333
A.digitifera	1000 ppm	0.653667
A.digitifera	1000 ppm	0.675
A.digitifera	1000 ppm	0.649333
M.digitata	400 ppm	0.598
M.digitata	400 ppm	0.583667
M.digitata	400 ppm	0.617333
M.digitata	400 ppm	0.5915
M.digitata	400 ppm	0.603167
M.digitata	400 ppm	0.6215
M.digitata	400 ppm	0.634833
M.digitata	400 ppm	0.590333
M.digitata	400 ppm	0.637667
M.digitata	400 ppm	0.6225
M.digitata	400 ppm	0.572833
M.digitata	400 ppm	0.595667
M.digitata	400 ppm	0.614
M.digitata	400 ppm	0.602833
M.digitata	400 ppm	0.615
M.digitata	400 ppm	0.618333
M.digitata	400 ppm	0.591
M.digitata	400 ppm	0.563667
M.digitata	400 ppm	0.599
M.digitata	400 ppm	0.581167
M.digitata	400 ppm	0.577333
M.digitata	400 ppm	0.578
M.digitata	400 ppm	0.621167
M.digitata	400 ppm	0.563833
M.digitata	600 ppm	0.596833
M.digitata	600 ppm	0.582167
M.digitata	600 ppm	0.601667
M.digitata	600 ppm	0.598667
M.digitata	600 ppm	0.601667
M.digitata	600 ppm	0.604333
M.digitata	600 ppm	0.616667
M.digitata	600 ppm	0.5885
M.digitata	600 ppm	0.535167
M.digitata	600 ppm	0.6315
M.digitata	600 ppm	0.607833
M.digitata	600 ppm	0.609667
M.digitata	600 ppm	0.609167
M.digitata	600 ppm	0.603833
M.digitata	600 ppm	0.6155
M.digitata	600 ppm	0.614833
M.digitata	600 ppm	0.632333
M.digitata	600 ppm	0.591167
M.digitata	600 ppm	0.587833
M.digitata	600 ppm	0.621
M.digitata	600 ppm	0.615833
M.digitata	600 ppm	0.604167
M.digitata	600 ppm	0.5985
M.digitata	600 ppm	0.6035
M.digitata	800 ppm	0.598167
M.digitata	800 ppm	0.601167
M.digitata	800 ppm	0.638667
M.digitata	800 ppm	0.586333
M.digitata	800 ppm	0.597167
M.digitata	800 ppm	0.5655
M.digitata	800 ppm	0.563833
M.digitata	800 ppm	0.583333
M.digitata	800 ppm	0.612667
M.digitata	800 ppm	0.563833
M.digitata	800 ppm	0.532833
M.digitata	800 ppm	0.570667
M.digitata	800 ppm	0.5875
M.digitata	800 ppm	0.616
M.digitata	800 ppm	0.627667
M.digitata	800 ppm	0.602667
M.digitata	800 ppm	0.6115
M.digitata	800 ppm	0.6115
M.digitata	800 ppm	0.582167
M.digitata	800 ppm	0.599
M.digitata	800 ppm	0.572667
M.digitata	800 ppm	0.603667
M.digitata	800 ppm	0.591
M.digitata	800 ppm	0.579333
M.digitata	1000 ppm	0.6035
M.digitata	1000 ppm	0.6085
M.digitata	1000 ppm	0.621667
M.digitata	1000 ppm	0.607333
M.digitata	1000 ppm	0.6125
M.digitata	1000 ppm	0.6145
M.digitata	1000 ppm	0.580667
M.digitata	1000 ppm	0.586667
M.digitata	1000 ppm	0.6
M.digitata	1000 ppm	0.612833
M.digitata	1000 ppm	0.582333
M.digitata	1000 ppm	0.624667
M.digitata	1000 ppm	0.5835
M.digitata	1000 ppm	0.612833
M.digitata	1000 ppm	0.580333
M.digitata	1000 ppm	0.600167
M.digitata	1000 ppm	0.583833
M.digitata	1000 ppm	0.604667
M.digitata	1000 ppm	0.607833
M.digitata	1000 ppm	0.610833
M.digitata	1000 ppm	0.603167
M.digitata	1000 ppm	0.5555
M.digitata	1000 ppm	0.579667
M.digitata	1000 ppm	0.588667
