# Supplementary material for: Responses of branching reef corals Acropora digitifera and Montipora digitata to elevated temperature and pCO2
Source: PeerJ. 2020 Dec 21;8:e10562. doi: 10.7717/peerj.10562 (PMC7759137; doi:10.7717/peerj.10562)
Supplement: Supplemental Information 10 [file peerj-08-10562-s010.xlsx]

## Sheet: Sheet1
Date of seawater sample collection	pCO2 and name of replicated aquariums (A and B)	Date of measurement	Salinity
2016-05-20	400ppmA	2016-07-29	34.755
2016-05-20	400ppmB	2016-07-29	34.7535
2016-05-20	600ppmA	2016-07-29	34.747
2016-05-20	600ppmB	2016-07-29	34.756
2016-05-20	800ppmA	2016-07-29	34.7655
2016-05-20	800ppmB	2016-07-29	34.7595
2016-05-20	1000ppmA	2016-07-29	34.7885
2016-05-20	1000ppmB	2016-07-29	34.7635
2016-05-28	400ppmA	2016-07-29	34.6935
2016-05-28	400ppmB	2016-07-29	34.6885
2016-05-28	600ppmA	2016-07-29	34.6755
2016-05-28	600ppmB	2016-07-29	34.689
2016-05-28	800ppmA	2016-07-29	34.6915
2016-05-28	800ppmB	2016-07-29	34.698
2016-05-28	1000ppmA	2016-07-29	34.6805
2016-05-28	1000ppmB	2016-07-29	34.696
2016-06-03	400ppmA	2016-07-29	34.682
2016-06-03	400ppmB	2016-07-29	34.674
2016-06-03	600ppmA	2016-07-29	34.663
2016-06-03	600ppmB	2016-07-29	34.682
2016-06-03	800ppmA	2016-07-29	34.68
2016-06-03	800ppmB	2016-07-29	34.683
2016-06-03	1000ppmA	2016-07-29	34.668
2016-06-03	1000ppmB	2016-07-29	34.678
2016-06-03	400ppmA	2016-08-01	34.714
2016-06-03	400ppmB	2016-08-01	34.719
2016-06-10	600ppmA	2016-08-01	34.716
2016-06-10	600ppmB	2016-08-01	34.7175
2016-06-10	800ppmA	2016-08-01	34.7245
2016-06-10	800ppmB	2016-08-01	34.726
2016-06-10	1000ppmA	2016-08-01	34.717
2016-06-10	1000ppmB	2016-08-01	34.7285
2016-06-17	400ppmA	2016-08-01	34.059
2016-06-17	400ppmB	2016-08-01	34.0595
2016-06-17	600ppmA	2016-08-01	34.058
2016-06-17	600ppmB	2016-08-01	34.0545
2016-06-17	８00ppmA	2016-08-01	34.068
2016-06-17	８00ppmB	2016-08-01	34.06
2016-06-17	1000ppmA	2016-08-01	34.077
2016-06-17	1000ppmB	2016-08-02	34.0535
2016-06-20	400ppmA	2016-08-01	34.1705
2016-06-20	400ppmB	2016-08-01	34.1715
2016-06-20	600ppmA	2016-08-01	34.174
2016-06-20	600ppmB	2016-08-01	34.176
2016-06-20	800ppmA	2016-08-01	34.1705
2016-06-20	800ppmB	2016-08-01	34.173
2016-06-20	1000ppmA	2016-08-01	34.1695
2016-06-20	1000ppmB	2016-08-01	34.1715
