# Supplementary material for: Responses of branching reef corals Acropora digitifera and Montipora digitata to elevated temperature and pCO2
Source: PeerJ. 2020 Dec 21;8:e10562. doi: 10.7717/peerj.10562 (PMC7759137; doi:10.7717/peerj.10562)
Supplement: Supplemental Information 11 [file peerj-08-10562-s011.xlsx]

## Sheet: Sheet1
Species	Temperature	Chlorophyll density
A. digitifera	30 C	0.596
A. digitifera	30 C	0.715
A. digitifera	30 C	0.65
A. digitifera	30 C	0.672
A. digitifera	30 C	0.645
A. digitifera	32 C	0.41
A. digitifera	32 C	0.382
A. digitifera	32 C	0.445
A. digitifera	32 C	0.371
A. digitifera	32 C	0.59
M. digitata	30 C	2.33112
M. digitata	30 C	2.02602
M. digitata	30 C	2.42882
M. digitata	30 C	1.37566
M. digitata	30 C	1.60473
M. digitata	32 C	2.20678
M. digitata	32 C	1.64014
M. digitata	32 C	0.327573
M. digitata	32 C	1.10194
M. digitata	32 C	0.145644
